# 1 **Structural Insights Into the Initiation and Elongation of** 2 **Ubiquitination by Ubr1**

3

## 4 **Authors:**

5 Man Pan<sup>1,4,\*</sup>, Qingyun Zheng<sup>2,4</sup>, Tian Wang<sup>2,4</sup>, Lujun Liang<sup>2,4</sup>, Junxiong Mao<sup>2</sup>, Chong Zuo<sup>2</sup>,  
6 Ruichao Ding<sup>2</sup>, Huasong Ai<sup>2</sup>, Yuan Xie<sup>1</sup>, Dong Si<sup>3</sup>, Yuanyuan Yu<sup>1,\*</sup>, Lei Liu<sup>2,\*</sup>, Minglei Zhao<sup>1,\*</sup>

7

## 8 **Affiliations:**

9 <sup>1</sup> Department of Biochemistry and Molecular Biology, The University of Chicago; Chicago, IL  
10 60637, USA.

11 <sup>2</sup> Tsinghua-Peking Center for Life Sciences, Department of Chemistry, Tsinghua University;  
12 Beijing 100084, China.

13 <sup>3</sup> Division of Computing and Software Systems, University of Washington Bothell, Bothell, WA  
14 98011

15 <sup>4</sup> These authors contributed equally to the work.

16 \*Corresponding authors:

17 Minglei Zhao. Email: [mlzhao@uchicago.edu](mailto:mlzhao@uchicago.edu)

18 Lei Liu. Email: [lliu@mail.tsinghua.edu.cn](mailto:lliu@mail.tsinghua.edu.cn)

19 Yuanyuan Yu. Email: [yuanyuanyu@uchicago.edu](mailto:yuanyuanyu@uchicago.edu)

20 Man Pan. Email: [panm@uchicago.edu](mailto:panm@uchicago.edu)

21 **Abstract**

22 The N-end rule pathway was one of the first ubiquitin (Ub)-dependent degradation pathways to  
23 be identified. Ubr1, a single-chain E3 ligase, targets proteins bearing a destabilizing residue at  
24 the N-terminus (N-degron) for rapid K48-linked ubiquitination and proteasome-dependent  
25 degradation. How Ubr1 catalyses the initiation of ubiquitination on the substrate and elongation  
26 of the Ub chain in a linkage-specific manner through a single E2 ubiquitin-conjugating enzyme  
27 (Ubc2) remains unknown. Here, we report the cryo-electron microscopy structures of two  
28 complexes representing the initiation and elongation intermediates of Ubr1 captured using  
29 chemical approaches. In these two structures, Ubr1 adopts different conformations to facilitate  
30 the transfer of Ub from Ubc2 to either an N-degron peptide or a monoubiquitinated degron.  
31 These structures not only reveal the architecture of the Ubr1 complex but also provide  
32 mechanistic insights into the initiation and elongation steps of ubiquitination catalysed by Ubr1.

33

34 **Keywords**

35 Ubr1, Ubc2, degron, ubiquitination, N-end rule, chemical trapping, single-particle cryo-EM

36

## 37 INTRODUCTION

38 Ubiquitination is involved in a wide range of cellular processes, such as protein homeostasis,  
39 cell cycle regulation, transcriptional regulation, and the stress response <sup>1,2</sup>. In particular, the N-  
40 end rule pathway was the first specific pathway of the ubiquitin (Ub) system to be identified <sup>3</sup>.  
41 This pathway determines the rate of protein degradation through recognition of the N-terminal  
42 residues termed N-degrons. In eukaryotes, N-degrons are recognized by specific ubiquitin  
43 ligases (E3) followed by rapid polyubiquitination of a nearby lysine residue, which marks the  
44 protein for degradation by the 26S proteasome <sup>4-7</sup>. It has been estimated that more than 80% of  
45 human proteins can be regulated by the N-end rule pathway <sup>8</sup>. Misregulation of the N-end rule  
46 pathway leads to the accumulation of unwanted proteins and proteotoxicity, which underlies  
47 ageing and specific diseases, including neurodegeneration <sup>9</sup>.

48 Three branches of the N-end rule pathway exist in eukaryotes, targeting N-terminal  
49 arginine residues (Arg/N), proline residues (Pro/N), and acetyl groups (Ac/N) <sup>10</sup>. In  
50 *Saccharomyces cerevisiae* (Baker's yeast), a single E3 ligase, Ubr1, is responsible for the  
51 Arg/N-end pathway, which recognizes two types of N-degrons: one type starts with basic  
52 residues (R, K, H), and the other starts with bulky hydrophobic residues (L, F, W, Y, I) <sup>11</sup>. By  
53 contrast, in mammals, multiple Ubr1 homologues participate in the Arg/N-end pathway <sup>12</sup>.  
54 Human Ubr1 shares 20% sequence identity with yeast Ubr1 and is involved in the processes of  
55 neurite outgrowth and axonal regeneration <sup>13</sup>. Mutations to human Ubr1 are associated with the  
56 congenital disorder known as Johanson-Blizzard syndrome <sup>9</sup>. Ubr1 is a single-subunit RING-  
57 type E3 ligase with a mass of over 200 kDa <sup>14</sup>. In vitro, yeast Ubr1 catalyses rapid K48-linked  
58 polyubiquitination on substrate proteins that satisfy the N-end rule through the single E2  
59 ubiquitin-conjugating enzyme Ubc2 (also known as Rad6) <sup>11</sup>, which has been used to prepare  
60 ubiquitinated substrates for in vitro assays <sup>15</sup>. Despite being discovered over 30 years ago <sup>14</sup>,  
61 the overall architecture of Ubr1 remains unknown. More importantly, how Ubr1 installs the first

62 Ub onto the substrate and the subsequent Ub molecules in an efficient and linkage-specific  
63 manner remains to be elucidated. Due to the transient nature of the reaction intermediates,  
64 visualization of this process is challenging.

65 Here, we developed chemical strategies to mimic the reaction intermediates of the first  
66 and second Ub transfer steps catalysed by yeast Ubr1 and determined two cryo-electron  
67 microscopy (cryo-EM) structures of Ubr1 in complex with Ubc2, Ub and either an N-degron  
68 peptide or a ubiquitinated N-degron peptide, representing the initiation and elongation steps of  
69 ubiquitination, respectively. The overall structures of these two complexes showed remarkable  
70 resemblances to that of anaphase-promoting complex/cyclosome (APC/C), a highly conserved  
71 multi-subunit E3 ligase involved in eukaryotic cell cycle regulation. Key structural elements,  
72 including a Ubc2 binding region (U2BR) and an acceptor Ub binding loop on Ubr1, were  
73 identified and characterized, which provided molecular insights into the initiation and elongation  
74 steps of ubiquitination catalysed by Ubr1. Ubiquitination underlies many fundamental cellular  
75 processes and is also critical for the development of novel therapeutic strategies, such as  
76 proteolysis-targeting chimera (PROTAC)<sup>16,17</sup>. Our chemical approaches provide a general  
77 strategy for the structural characterizations of other systems.

78



79 **RESULTS**

80 Previous work has shown that an Arg/N-degron peptide consisting of 43 amino acids can be  
81 polyubiquitinated at a Lys residue with K48 linkages<sup>15</sup>. We first synthesized the degron peptide  
82 (hereafter referred to as Degron) and a monoubiquitinated Degron (hereafter referred to as Ub-  
83 Degron) using solid phase peptide synthesis (**Fig. S1a & b**). For Ub-Degron, the native  
84 isopeptide bond was introduced by using a side chain-modified Lys residue through solid phase  
85 peptide synthesis. Subsequently, hydrazide-based native chemical ligation (NCL) was  
86 conducted to place Ub onto the Lys side chain<sup>18</sup> (**Fig. S1b**). To monitor the polyubiquitination  
87 reaction, we further labelled both Degron and Ub-Degron with fluorescein-5-maleimide (**Fig.**  
88 **S1c & d**) and confirmed their reactivity in a K48 linkage-specific manner with Ubr1 and Ubc2 in  
89 vitro (**Fig. S1e**). Next, we performed single-turnover ubiquitination reactions using Ubc2 loaded  
90 with mutant Ub (K48R) at a saturating concentration. The estimated  $K_m$  and  $K_{cat}$  for Degron  
91 were  $1.24 \pm 0.69 \mu\text{M}$  and  $0.27 \pm 0.07 \text{ min}^{-1}$ , respectively, which represents the initiation step  
92 catalysed by Ubr1 (**Fig. S1f**). The single-turnover ubiquitination of Ub-Degron, representing the  
93 first elongation step catalysed by Ubr1, showed slightly slower kinetics with an estimated  $K_m$  of  
94  $1.63 \pm 0.69 \mu\text{M}$  and  $K_{cat}$  of  $0.17 \pm 0.02 \text{ min}^{-1}$  (**Fig. S1g**). Notably, this behaviour was different  
95 from that of multi-subunit cullin-RING ubiquitin ligase (CRL)-mediated ubiquitination, which is a  
96 two-step process involving a slow initiation step followed by rapid K48-specific chain elongation  
97 <sup>19,20</sup>.

98 To capture the initiation step of ubiquitination catalysed by Ubr1, we synthesized a stable  
99 complex of Ubc2, Ub and Degron that mimicked the reaction intermediate (**Fig. 1a and Fig.**  
100 **S2a**). A similar design was used in recent studies of the SCF-E3 complex; however, in this  
101 work, the Ub moiety was conjugated to the natural  $\epsilon$ -amino group of K17 in Degron instead of  
102 being directly fused to the N-terminus of the substrate<sup>21,22</sup>. This stable intermediate mimic was  
103 then mixed with Ubr1 in a 1:1.5 molar ratio and incubated on ice for 30 minutes followed by

104 vitrification and single-particle cryo-EM analysis (**Fig. S2c**). A dataset of 10,592 movie stacks  
105 was collected and processed following the established workflow in RELION<sup>23</sup> (**Fig. S3a**). The  
106 final reconstructed map had an overall resolution of 3.3 Å, allowing for de novo model building  
107 (**Figs. S3b, 3c, and 6; Table S1**). Ubr1 is a single-subunit E3 ligase with more than 1,900  
108 amino acids (**Fig. 1b**). Only the Ubr-Box1 structure was determined previously<sup>24</sup>. To overcome  
109 the difficulty during model building, we used the artificial intelligence (AI)-based DeepTracer  
110 program<sup>25</sup> to build a starting model of the entire complex (see Methods for details) and  
111 manually adjusted and refined the model using COOT<sup>26</sup>. The final model was refined in real  
112 space using PHENIX<sup>27</sup> (**Table S2**).

113 The overall structure of the initiation complex, named Ubr1-Ubc2-Ub-Degron, adopted a  
114 sailboat-like shape, bearing high resemblance to APC/C<sup>28,29</sup>, although Ubr1-Ubc2-Ub-Degron  
115 was much smaller at 120 Å × 120 Å × 65 Å (**Fig. 1c**). The hull of the “boat” is a large helical  
116 scaffold (white-grey) interspaced by three domains: Ubr-Box1 (dark purple), Ubr-Box2 (light  
117 blue), and a winged helical domain (dark blue). The helical scaffold is reminiscent of similar  
118 bundle repeats found in other E3 ligases, especially the cullin proteins in CRLs<sup>21,22,30</sup>. We  
119 further defined four regions of the helical scaffold based on the interspaced domains (**Fig. 1b**,  
120 **Fig. S4a & b**). Only the structure of Ubr-Box1 has been previously reported<sup>24</sup>. The other  
121 domains were identified using SWISS-MODEL<sup>31</sup>. The front of the “boat” is where the Ub-loaded  
122 Ubc2 is recruited. Ubc2 is primarily bound by a single helix of Ubr1, termed the Ubc2 binding  
123 region (U2BR, dark green, **Fig. 1b & c**). A RING finger domain (cyan) follows U2BR and  
124 interacts with Ubc2 and the loaded Ub (**Fig. S4d**). A new helical domain termed the cap helical  
125 domain (pink) follows the RING finger domain (**Fig. S4c**). The cap helical domain adopted a  
126 new fold that did not give similar hits from the DALI server for protein structure comparison<sup>32</sup>.  
127 Finally, the UBLC domain (UBR/Leu/Cys domain)<sup>33</sup> (orange) acts like the mast of the “boat” by  
128 interacting with Ubr-Box1 and the winged helical domain (**Fig. 1c**). Quadruple mutations of the

129 residues involved in this interface (H161A, Y933A, D1175A, and H1763A) greatly impaired the  
130 activity of Ubr1 (**Fig. S4f**).

131 The first three residues (RHG) of the Degron peptide were resolved bound to the designated  
132 pocket of Ubr-Box1 (**Fig. S4e**)<sup>24</sup>. The active site of Ub transfer is ~35 Å away from the C-  
133 terminus of Gly3, where Lys17 forms an isopeptide bond with the C-terminal Cys76 of Ub. The  
134 thirteen residues between Lys17 and Gly3 were not resolved, but the distance between them  
135 indicated an extended conformation (2.7 Å/residue). A disulfide bond formed between the  
136 cysteine and the active site of Ubc2 (Cys88), as designed (**Fig. 1c**). Ub is on the backside of the  
137 complex and interacts with one of the zinc-binding sites in the RING finger domain through the  
138 Ile36 patch (**Fig. S4d**). The other zinc-binding site of the RING finger domain interacts with  
139 Ubc2 (**Fig. S4d**). In addition, the U2BR of Ubr1 forms an extensive interface with the backside  
140 of Ubc2 (**Fig. 1c**), reminiscent of the Ube2g2 binding region (G2BR) in Gp78, an E3 ligase  
141 involved in endoplasmic reticulum-associated degradation (ERAD)<sup>34</sup>, and the Ubc7 binding  
142 region (U7BR) in Cue1p, a component of several E3 complexes involved in ERAD<sup>35</sup>. Together,  
143 the noncovalent interactions between Ubr1, Ubc2, and Ub position the Ubc2~Ub thioester bond  
144 for nucleophilic attack by Lys17 on Degron. In summary, this complex structure shows how  
145 Ubr1 recruits Ubc2~Ub and facilitates the transfer of Ub to a specific Lys residue on the Degron  
146 peptide; that is, the initiation step.

147 Once the first Ub is installed on the substrate, the subsequent elongation of the Ub chain cannot  
148 occur without rearrangement of the structure. To understand the process and capture the  
149 intermediate state of the elongation step, we designed another stable complex mimicking the  
150 transition state (**Fig. 2a**). The C-terminus of donor Ub was linked to both Cys88 of Ubc2 (active  
151 site) and K48 of acceptor Ub on Ub-Degron (**Fig. 2b**). Ubc2 was first chemically modified with  
152 the bifunctional adaptor molecule **1**<sup>36</sup> at the catalytic Cys to form molecule **2**. Subsequently, the  
153 S-acetamidomethyl (Acm) group on molecule **2** was removed to expose a β-

154 mercaptoethylamine group for NCL with a Ub thioester (Ub-MesNa)<sup>36</sup>, generating Ubc2~Ub  
155 carrying an additional thiol group (molecule **3**). Finally, a stable intermediate mimic was  
156 obtained by the creation of a disulfide bond between the thiol groups of molecule **3** and a Ub-  
157 Degron carrying the K48C point mutation (**Fig. 2b, Fig. S2b**). The intermediate mimic was then  
158 mixed with Ubr1 in a 1:1.5 molar ratio and incubated on ice for 30 minutes, followed by  
159 vitrification and single-particle cryo-EM analysis (**Fig. S2c**). A dataset of 5083 movie stacks was  
160 collected and processed (**Fig. S5a**). The final reconstructed map had an overall resolution of 3.6  
161 Å (**Fig. S5b & c**). Model building was performed by first docking the structure of the initiation  
162 complex (Ubr1-Ubc2-Ub-Degron), followed by rigid-body adjustment in Chimera and manual  
163 adjustment in COOT<sup>26</sup>. The final model was refined in real space using PHENIX<sup>27</sup> (**Table S2**).

164 The overall structure of the elongation complex, named Ubr1-Ubc2-Ub-Ub-Degron, adopted a  
165 sailboat-like shape similar to that of Ubr1-Ubc2-Ub-Degron (**Fig. 2c**). The additional acceptor  
166 Ub binds to the helical scaffold of Ubr1 at a loop (678-681) located in region C, which was  
167 disordered in the initiation complex (**Fig. 2d & e**). The acceptor Ub further participated in the  
168 recruitment of Ubc2~Ub by binding at a new interface on Ubc2 (**Fig. 2d & f**). When mutations  
169 were introduced into the Ub binding loop on Ubr1 and the new interface (N123 and V124) on  
170 Ubc2, the polyubiquitination level on Degron and Ub-Degron were greatly reduced compared to  
171 that of the wild-type (**Fig. S7a & b**). Importantly, the Ub binding loop mutant transferred more  
172 Ub to Degron than to Ub-Degron, suggesting that the elongation step was impaired (**Fig. S7a**).

173 We further examined the single-turnover ubiquitination of the Ub binding loop mutant using  
174 Ubc2 charged with either wild-type Ub or mutant Ub with all lysines mutated to arginines (**Fig.**  
175 **S7c**). Much higher Ub discharge was observed for Degron than Ub-Degron. These results  
176 suggested a crucial role of the Ub binding loop on Ubr1 in the elongation step.

177 In addition to the new interacting surfaces on Ubr1 and Ubc2, U2BR and Ubc2 (including the  
178 donor Ub) underwent a displacement of approximately 20 Å, whereas the relative positions of

179 other domains on Ubr1 remained unchanged (**Fig. 2g and Fig. S7d & e**). This displacement of  
180 U2BR and Ubc2 repositioned the presumed thioester bond between Ubc2 and the donor Ub so  
181 that this bond was approachable by the K48 of the acceptor Ub on Ub-Degron (**Fig. 2f & g**).  
182 Together, the two complex structures suggested that the displacement of U2BR on Ubr1 is the  
183 key to accommodating extra Ub molecules during the transition from the initiation step to the  
184 elongation step.

185 We further investigated the extensive binding interface between U2BR and Ubc2 (823.3 Å<sup>2</sup>, **Fig.**  
186 **3a & b**). Mutations of interface residues either on U2BR (F1190A, Q1186A, F1183A, H1175A)  
187 or Ubc2 (L29A, P30A, N37A, W149A) severely impacted the activity of Ubr1 (**Fig. 3d**). Almost  
188 no ubiquitination of Degron was observed when including both mutants. We further synthesized  
189 a U2BR peptide (Ubr1 1165-1200) and performed an in vitro ubiquitination reaction in the  
190 presence of the free U2BR peptide, and dose-dependent inhibition of polyubiquitination was  
191 observed (**Fig. 3e**). Using isothermal titration calorimetry (ITC), we quantified the affinity  
192 between the U2BR peptide and Ubc2. The dissociation constant (*K<sub>d</sub>*) was 143 (±45) nM (**Fig.**  
193 **S8a**). The effect of E1-dependent thioester bond (Ubc2~Ub) formation in the presence of the  
194 U2BR peptide was also examined. Interestingly, an inhibitory effect (IC<sub>50</sub> = 9.75 ± 4.34 μM)  
195 was observed (**Fig. S8b & c**), which was different from the activation effects of U7BR on Ubc7  
196 <sup>35</sup> and the rate-decreasing effects of G2BR on UBE2G2 <sup>34</sup>. We further tested the accessibility of  
197 the catalytic cysteine (Cys88) of Ubc2 using a bulky fluorescent alkylation reagent (BFAR),  
198 fluorescein-5-maleimide, in the presence of the U2BR peptide. The results suggested that the  
199 U2BR peptide did not enhance the accessibility of this cysteine residue (**Fig. 3f**).

200 In both the initiation and elongation structures, we observed smaller interfaces between Ubc2  
201 and the RING finger domain of Ubr1 (410.3 Å<sup>2</sup> and 208.2 Å<sup>2</sup>, respectively) than were observed  
202 in previous studies, such as the interface between UBCH5A (E2) and the RING domain of  
203 RNF4 (547.4 Å<sup>2</sup>, PDB: 5FER, **Fig. 3c & g**) <sup>37</sup>, although the so-called closed conformation of the

204 E2 and Ub subcomplexes remained the same. Indeed, mapping of conserved E2 residues  
205 involved in the RING-E2 interaction showed that Ubc2 does not have the highly conserved  
206 aromatic Phe residue involved in the interface, which has been shown to be important for  
207 activity<sup>37</sup>. In yeast and human Ubc2, this residue is mutated to Asn (**Fig. 3h**). As expected, the  
208 N65F mutation of Ubc2 decreased ubiquitination activity in vitro (**Fig. 3i**), suggesting that this  
209 Phe residue is not required for the interaction between Ubc2 and the RING finger domain of  
210 Ubr1. Interestingly, the N65A mutation increased the amount of polyubiquitinated Degron (**Fig.**  
211 **3i**), suggesting that N65 may not be important for the elongation of Ubr1-mediated  
212 ubiquitination. Notably, the interface between Ubc2 and the RING domain changed in the  
213 elongation structure. A conserved Trp residue (W96) flipped out and interacted with the RING  
214 domain instead of N65 (**Fig. 3g & h and Fig. S7h**). The W96A mutation did not affect the  
215 initiation step but severely decreased the amount of polyubiquitinated Degron (**Fig. 3i**). This  
216 result suggested that switching of the interface is critical for the processivity of Ubr1 and may  
217 play a role in other E2-E3 systems.

218

## 219 DISCUSSION

220 Visualizing E3-mediated substrate ubiquitination is of great importance<sup>38</sup>, and it is also  
221 informative for the development of novel therapeutic strategies such as PROTAC<sup>16,17</sup>. The  
222 chemical trapping of ubiquitinated intermediates has played critical roles in the mechanistic  
223 understanding of various E3 ligases. The Lima group engineered an E2 to trap the E3<sup>Siz1</sup>/E2<sup>Ubc9</sup>-  
224 SUMO/PCNA complex, demonstrating that E3 could bypass E2 specificity to force-feed a  
225 substrate lysine into the E2 active site<sup>39</sup>. The Schulman group designed a chemically trapped  
226 complex of neddylated CRL1<sup>β-TRCP</sup>-UBE2D-Ub-phosphorylated IκBα, showing that the E3 ligase  
227 CRL1<sup>β-TRCP</sup> primed and positioned Ub and the substrate lysine for transfer<sup>37</sup>. Here, through the  
228 chemical synthesis of two ubiquitination intermediate mimics representing the initiation and  
229 elongation steps and single-particle cryo-EM analysis, we revealed the mechanism of Ubr1-  
230 mediated ubiquitination involved in the N-end rule pathway. Our cryo-EM structures suggested  
231 the rapid and linkage-specific ubiquitination of Ubr1 (**Fig. 4**). Specifically, substrates bearing  
232 destabilizing amino-terminal degrons are captured by Ubr1 through the Ubr-Box. Ub-charged  
233 E2, Ubc2~Ub, is recruited through the U2BR and the RING domain. The positions of these  
234 domains on Ubr1 facilitate Ub thioester transfer to a Lys residue near the degron (initiation  
235 step). The helical scaffold of Ubr1 provides an additional anchor (the Ub binding loop) for Ub on  
236 the newly formed monoubiquitinated substrate. Ub also participates in the rearrangement of  
237 U2BR-Ubc2 by interacting with a new interface on Ubc2. The specific binding between the Ub  
238 binding loop and Ub ensures close proximity of K48 on Ub and the newly formed thioester bond  
239 at the active site of Ubc2, which facilitates the transfer of the second Ub (elongation step). We  
240 further speculate that similar rearrangements occur for subsequent elongation steps. The most  
241 distal Ub is always engaged by the Ub binding loop on Ubr1 to ensure linkage specificity of the  
242 polyubiquitin chain (Fig. 4).

243 Our structures revealed that U2BR plays a key role in the recruitment of Ubc2. Notably, single-  
244 particle analysis of Ubr1 alone showed that the cap helical domain was very flexible without  
245 Ubc2 and the substrate (**Fig. S9**). U2BR could not be resolved from 2D class averages and 3D  
246 reconstruction, suggesting that the chemical synthesis of intermediate mimics is the key to  
247 stabilizing Ubr1, which leads to structure determination at near-atomic resolution. The strategies  
248 presented in this study can be adopted to investigate the mechanism of other E3 ligases.

249 In humans, Johanson-Blizzard syndrome is a rare and severe autosomal recessive genetic  
250 disorder caused by mutations to Ubr1<sup>9</sup>. Human Ubr1 shares 20% sequence identity with the  
251 yeast homologue, especially in Ubr-Box1, Ubr-Box2, region C of the helical scaffold, the U2BR  
252 and the RING finger domain. Given the similarity, human Ubr1 is very likely to have a similar  
253 mechanism. Our structures provide a molecular basis to understand the pathogenesis of this  
254 disease.

255



256 **ACKNOWLEDGEMENTS**

257 We thank the staff at the National Cryo-Electron Microscopy Facility at the Frederick National  
258 Laboratory and the Advanced Electron Microscopy Facility at the University of Chicago for the  
259 help in cryo-EM data collection. **Funding:** Funding for this work was, in part, provided by  
260 the Catalyst Award from the Chicago Biomedical Consortium. This work was supported by  
261 Chicago Biomedical Consortium Catalyst Award C-086 to M.Z. We thank the National Key R&D  
262 Program of China (No. 2017YFA0505200), NSFC (91753205) for financial support. This  
263 research was, in part, supported by the National Cancer Institute's National Cryo-EM Facility at  
264 the Frederick National Laboratory for Cancer Research under contract HSSN261200800001E.

265

266 **AUTHOR CONTRIBUTIONS**

267 M.P., M.Z., L.L. and Y.Y. designed all the experiments and interpreted the results. M.P., Q.Z.  
268 and L. L. designed the synthetic route for chemically synthesized ubiquitination initiation and  
269 elongation intermediate mimics. T.W. synthesized the fluorescently labelled Ub-Degron and the  
270 elongation intermediate mimic. L.J.L. synthesized the fluorescently labelled Degron and the  
271 initiation intermediate mimic. M.P., Y.Y., D.S., and M.Z. performed cryo-EM data collection and  
272 processing. J.M. performed the in vitro ubiquitination assays with Ubr1 and Ubc2 mutants. Q.Z.  
273 performed characterization of the U2BR peptide on the enzymatic properties of Ubc2. T.W.,  
274 Y.Y., R.D., J.M., H.A. and Y.X. cloned, expressed, and purified Ubr1, Ubc2 and their mutants.  
275 M.Z., M.P., and L.L. wrote the paper. M.Z., L.L., Y.Y. and M.P. supervised the project.

276

277 **COMPETING INTERESTS**

278 The authors declare no competing interests.

279 **Figure Legends**

280 **FIG. 1**

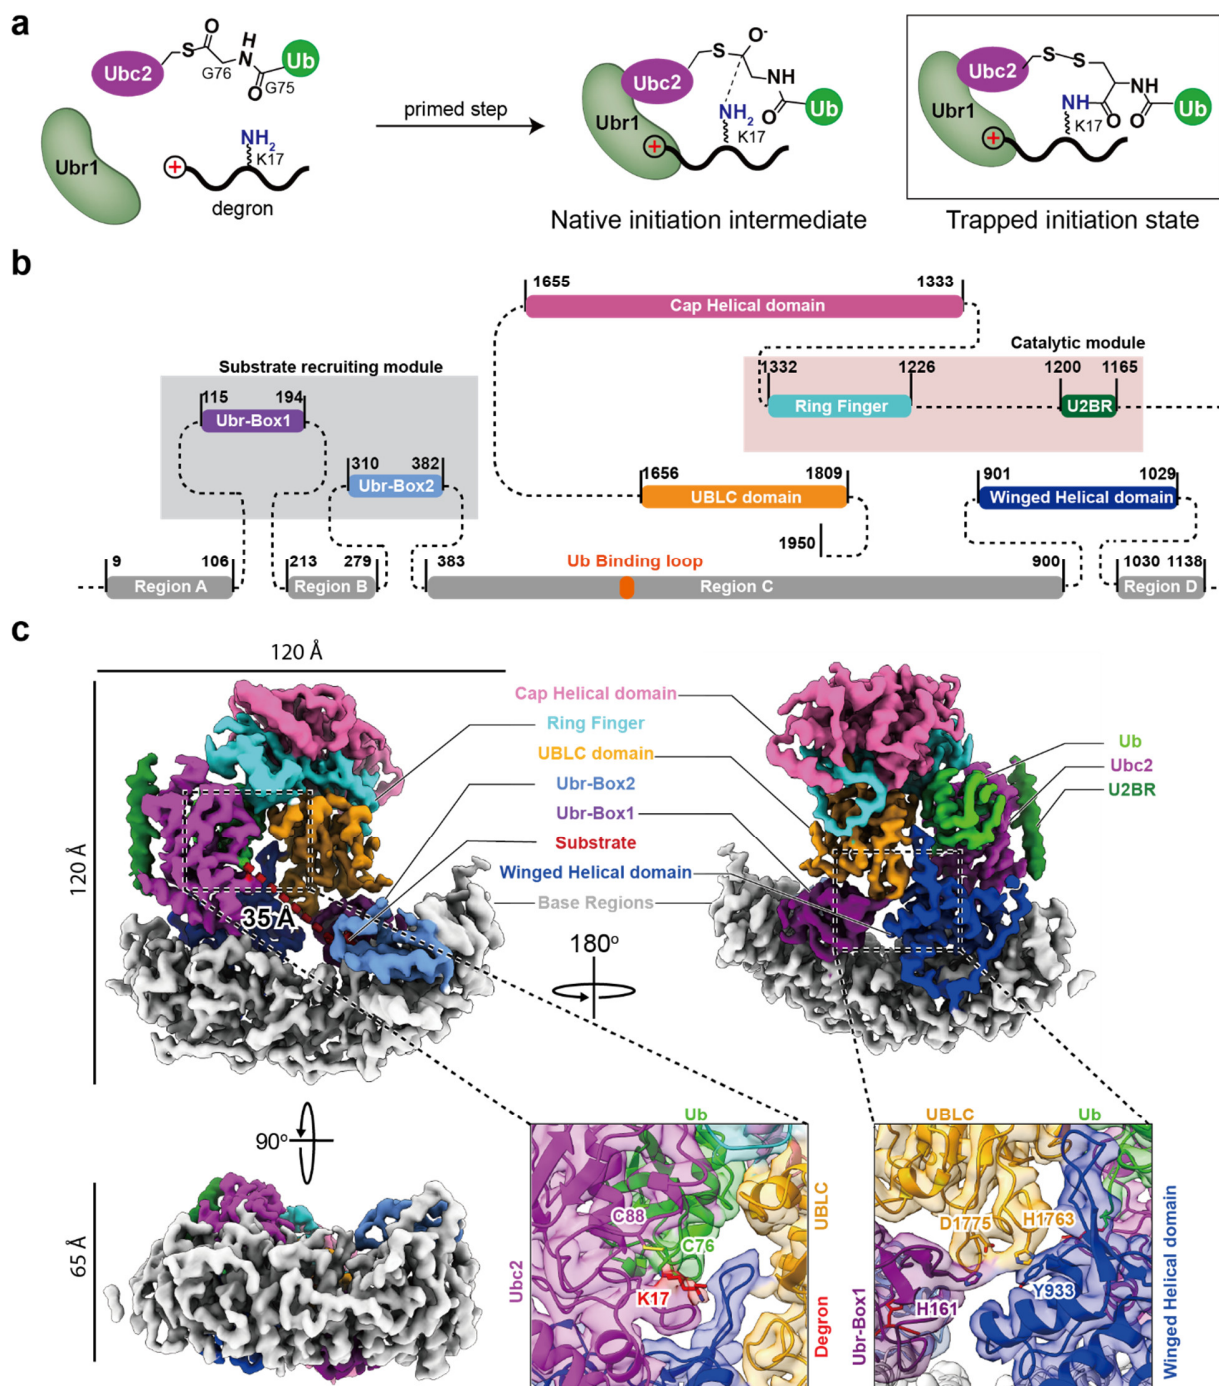

281

282

283 **Figure 1: Structure of the initiation complex.**

284 **a**, A schematic representation of the transition state of the initiation step. The side chain of a Lys  
285 residue on Degron attacks the thioester bond of Ubc2~Ub. The inset shows the designed  
286 intermediate structure mimicking the transition state of the initiation step. **b**, A schematic domain  
287 diagram of Ubr1, with residue boundaries indicated. Dotted lines represent unresolved linkers  
288 and regions. **c**, Cryo-EM maps of the initiation complex (unsharpened, contour level: 0.017).  
289 The colour code of Ubr1 is the same as that in panel **b**. The left inset shows the structure at the  
290 catalytic site. The right inset shows the molecular interactions between UBLC, Ubr-Box1 and the  
291 winged helical domain. Mutations of the four residues at the interface (H161, Y933, H1763 and  
292 H1775) impaired the activity of Ubr1.

293

294 **FIG. 2**

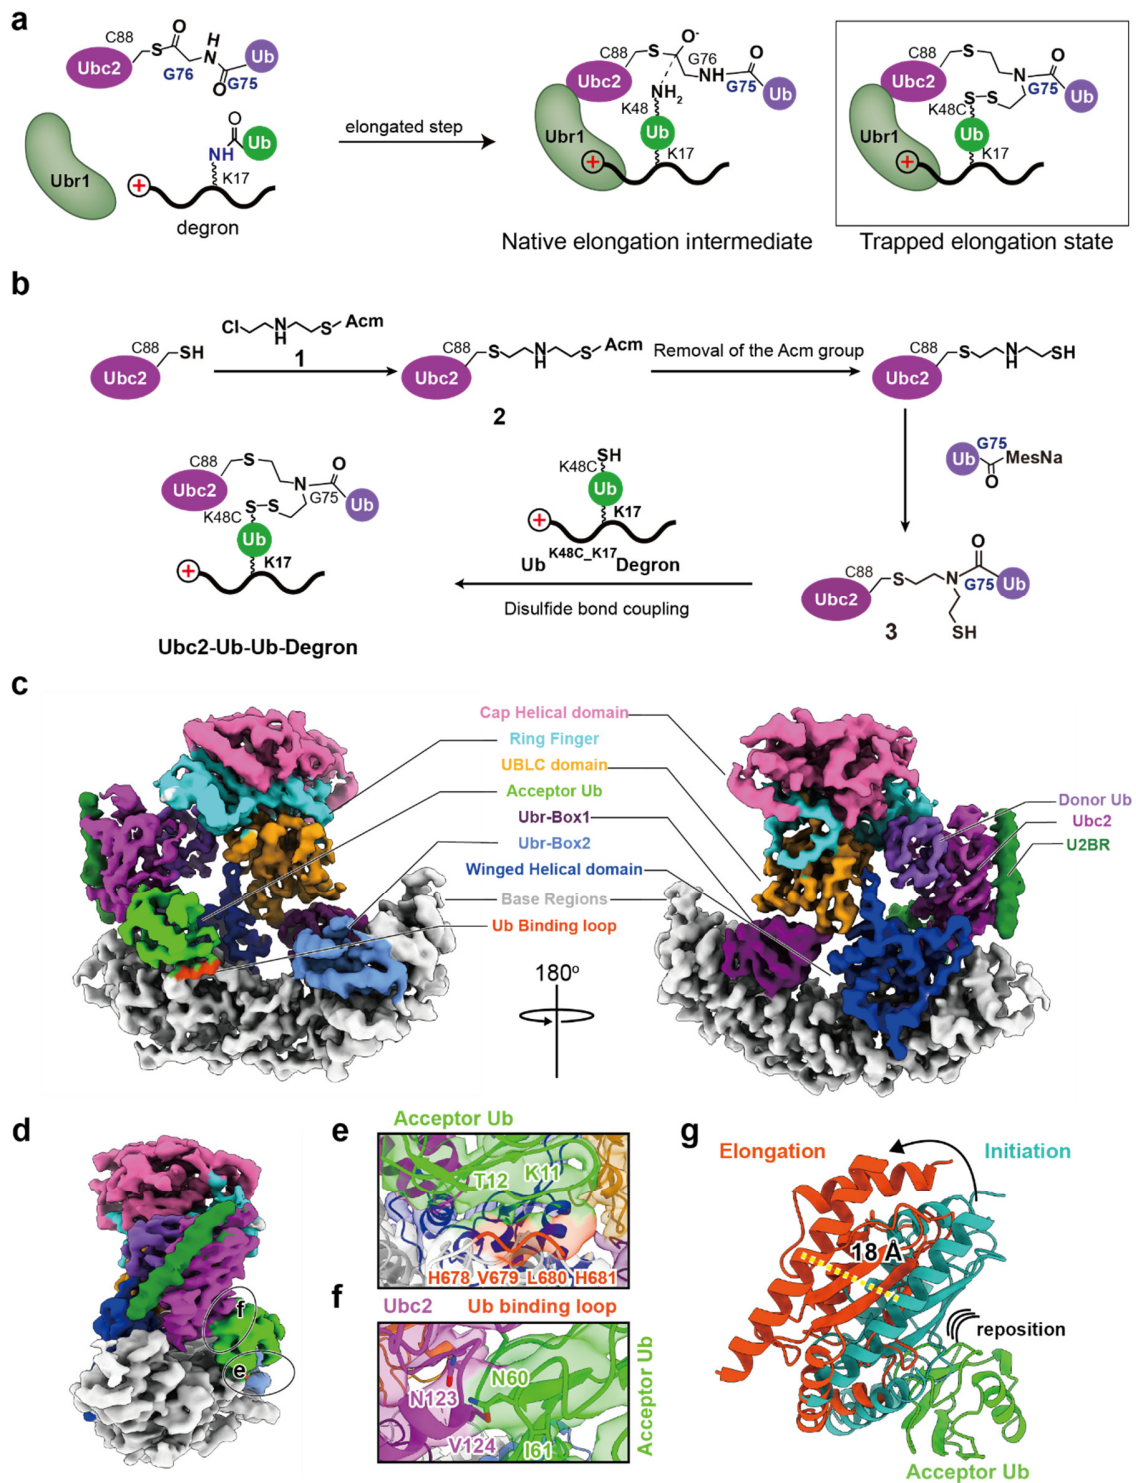

295

296

297 **Figure 2: Structure of the elongation complex.**

298 **a**, A schematic representation of the transition state of the elongation step. The side chain of  
299 K48 on Ub-Degron attacks the thioester bond of Ubc2~Ub. The inset shows the designed  
300 intermediate structure mimicking the transition state of the elongation step. **b**, The synthetic  
301 route of the intermediate structure mimicking the transition state of the elongation step. **c**, Cryo-  
302 EM maps of the elongation complex (unsharpened, contour level: 0.017). The colour code of  
303 Ubr1 is the same as that in Fig. 1**b**. **c**, A side view of the elongation complex. Additional  
304 interfaces resulting from acceptor Ub are highlighted in circles. **e**, A close-up view of the  
305 interface between acceptor Ub and the Ub binding loop of Ubr1. **f**, A close-up view of the  
306 interface between acceptor Ub and Ubc2. **g**, Displacement of Ubc2 observed after  
307 superimposing the initiation and elongation structures based on Ubr1.

308



309 **FIG. 3**

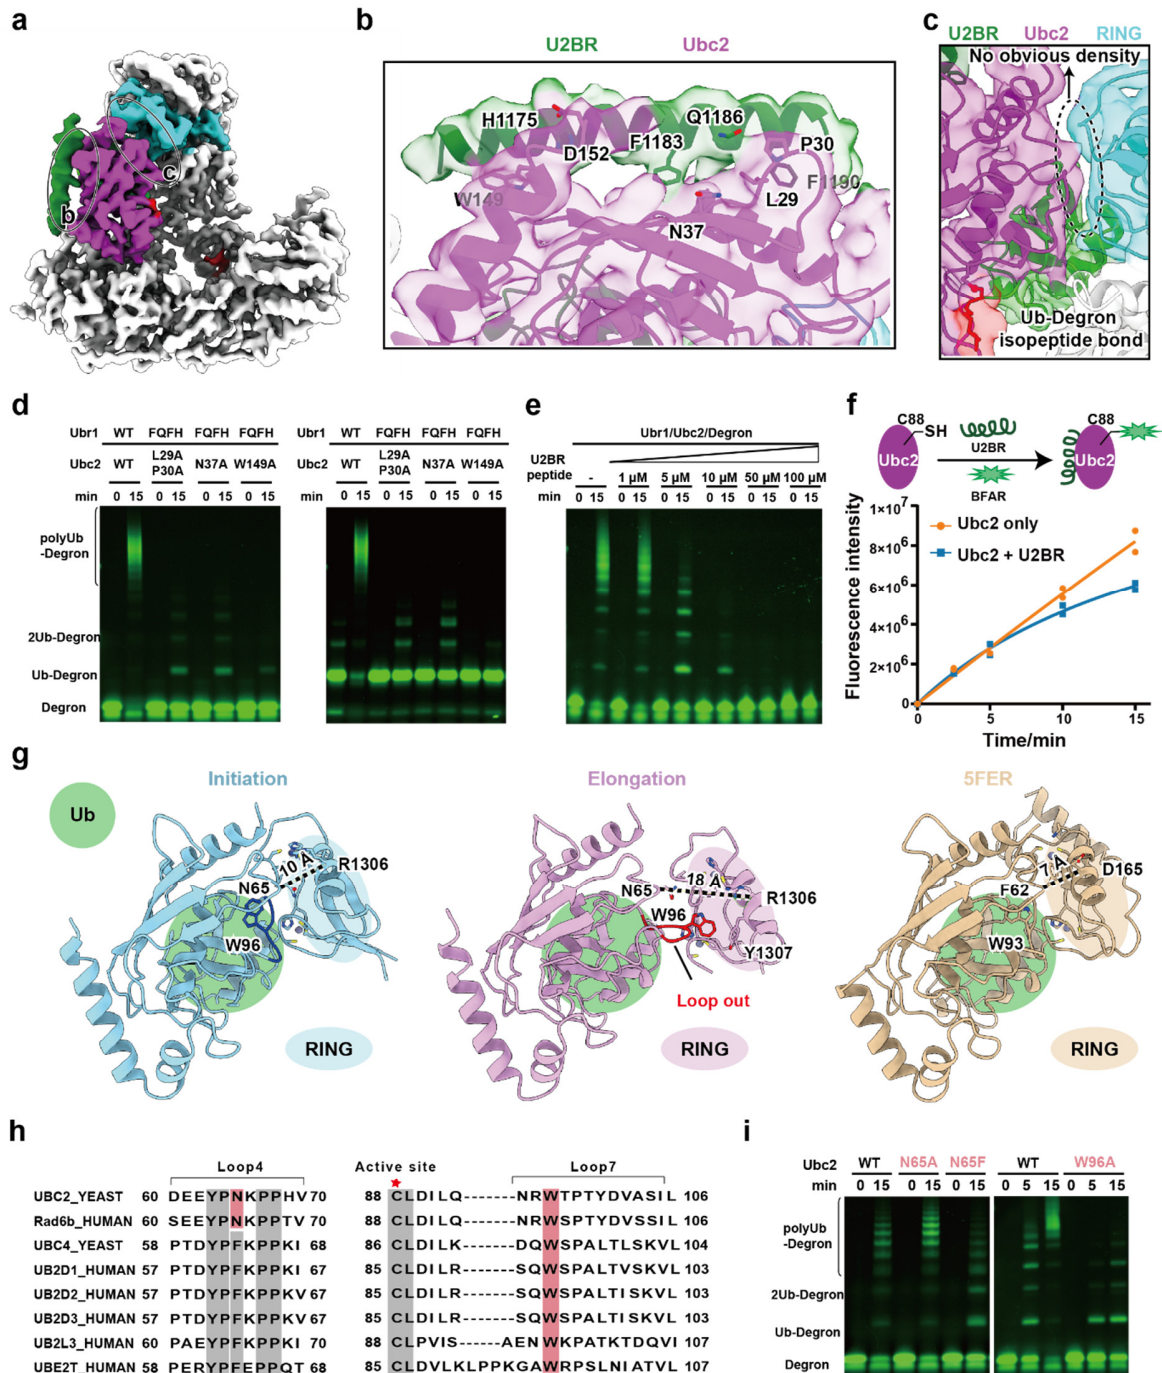

310

311

312 **Figure 3: Analysis of the interactions between Ubc2 and Ubr1.**

313 **a**, Structure of the initiation complex. The interfaces between Ubc2 and Ubr1 are highlighted  
314 with circles. **b**, A close-up view of the interface between Ubc2 and the U2BR of Ubr1. Labelled  
315 residues are involved in extensive noncovalent interactions. **c**, A close-up view of the interface  
316 between Ubc2 and the RING finger domain of Ubr1. **d-e**, In vitro Ubr1-dependent ubiquitination  
317 assays. **d**, Ubr1 and Ubc2 mutants at the interface shown in panel **b** were tested. **e**, The  
318 inhibition of Ubr1-dependent ubiquitination in the presence of increasing concentrations of a  
319 synthetic U2BR peptide. **f**, The accessibility of the catalytic cysteine (Cys88) of Ubc2 tested  
320 using a BFAR in the presence or absence of the synthetic U2BR peptide. The average  
321 fluorescence from two independent experiments was plotted. **g**, A comparison of the interfaces  
322 between Ubc2~Ub and the RING finger domain of Ubr1 in the initiation and elongation  
323 complexes with the interface between Ubch5a and the RING finger domain of RNF4 (PDB:  
324 5FER)<sup>37</sup>. The Ub and RING finger domains in each structure are highlighted with green circles  
325 and ovals, respectively. The loop around W96, which undergoes a conformational change from  
326 initiation to elongation, is highlighted in blue and red, respectively. **h**, Sequence alignment of  
327 multiple E2 enzymes, including yeast and human Ubc2 (also known as Rad6b). Two regions  
328 involved in the interaction with the RING finger domains are shown. **i**, In vitro Ubr1-dependent  
329 ubiquitination assays investigating the role of N65 and W96 of Ubc2 in the interaction with the  
330 RING finger domain of Ubr1.

331 **FIG. 4**

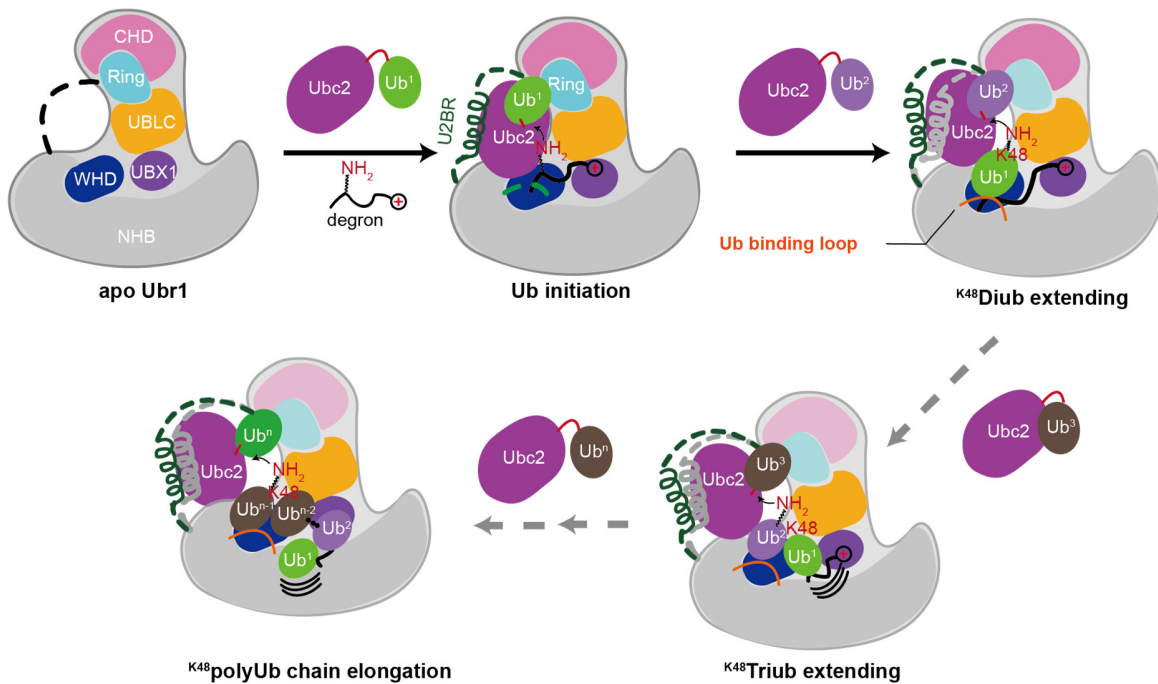

332

333 **Figure 4: Model of Ubr1-mediated polyubiquitination.**

334 A cartoon representation of Ubr1-mediated polyubiquitination starting from a degron peptide

335 with a positively charged N-terminal residue. The first two steps correspond to the initiation and

336 elongation structures described in this study. Subsequent elongation of the polyubiquitin chain is

337 hypothetical. The Ub molecules being conjugated are sequentially numbered as Ub<sup>1</sup>, Ub<sup>2</sup>, ...,

338 Ub<sup>n</sup>.

339



340 **Supplementary Figures and Legends**

341 **FIG. S1**

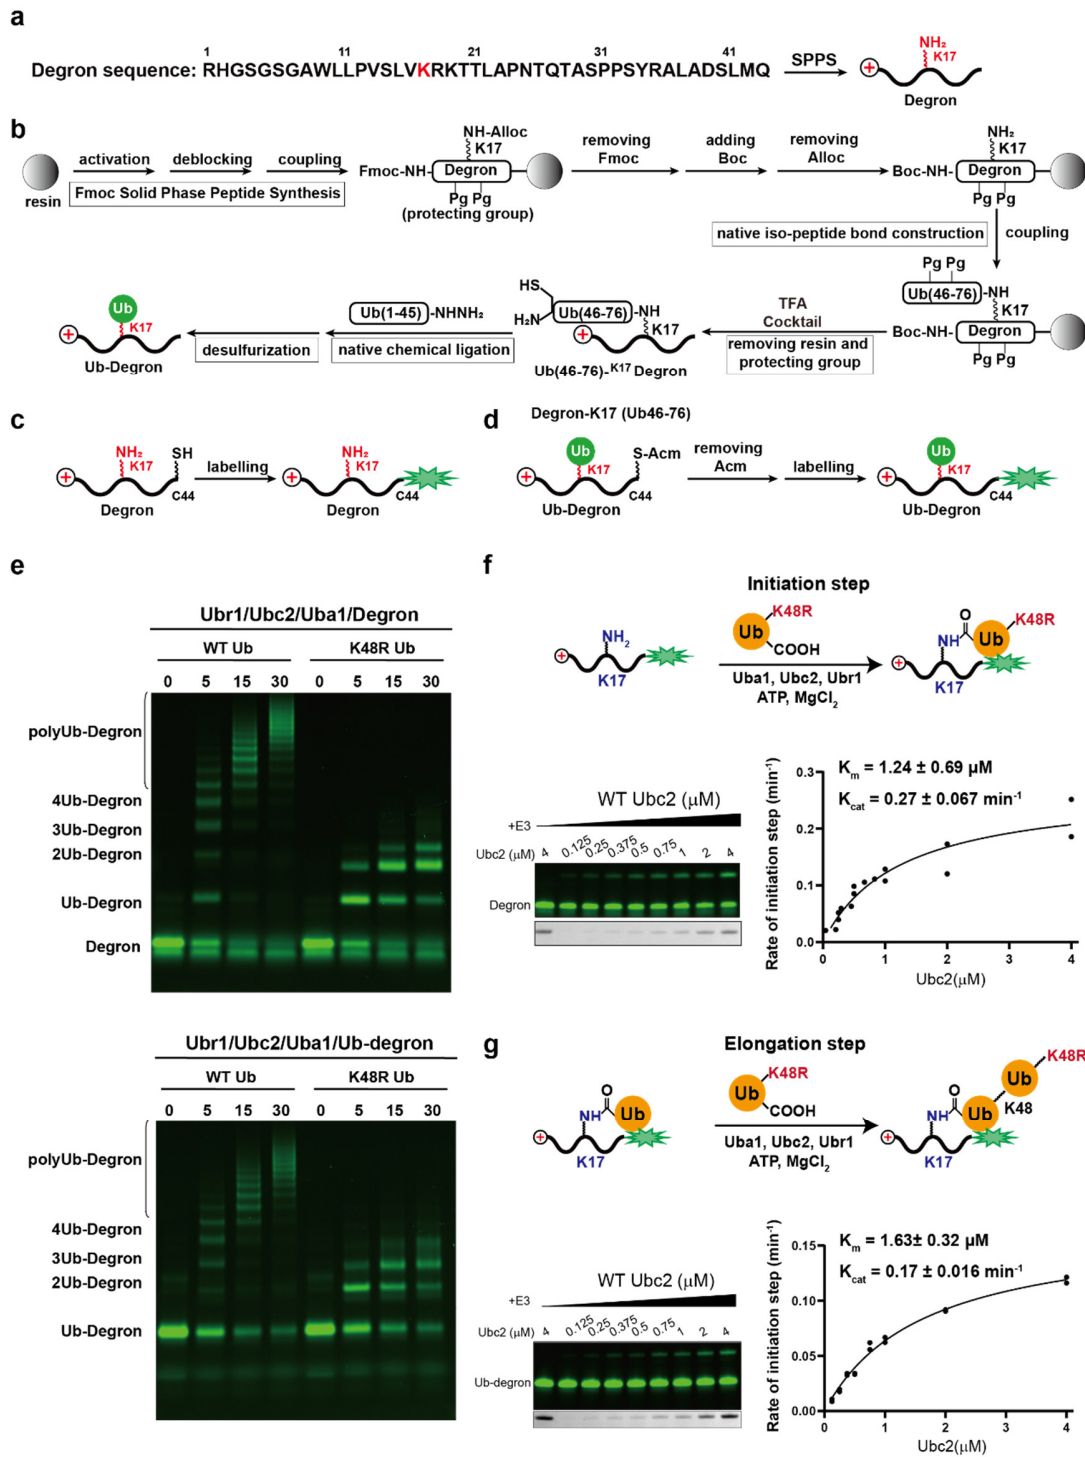

343 **Fig. S1: Ubr1-mediated K48-linked polyubiquitination of degron peptides.**

344 **a**, Amino acid sequence of the degron peptide (Degron). **b**, The synthetic route of the  
345 monoubiquitinated degron peptide (Ub-Degron). **c-d**, Fluorescent labelling of Degron (**c**) and  
346 Ub-Degron (**d**). **e**, In vitro Ubr1-dependent ubiquitination assays using fluorescent Degron (top)  
347 and Ub-Degron (bottom) as substrates. **f-g**, Quantitative evaluation of the Ubr1 enzyme kinetics  
348 for ubiquitination initiation (**f**) and the first step of elongation (**g**). Averages of two independent  
349 experiments were plotted and fit to the Michaelis–Menten model to estimate the  $K_m$  and  $K_{cat}$ .

350

351 **FIG. S2**

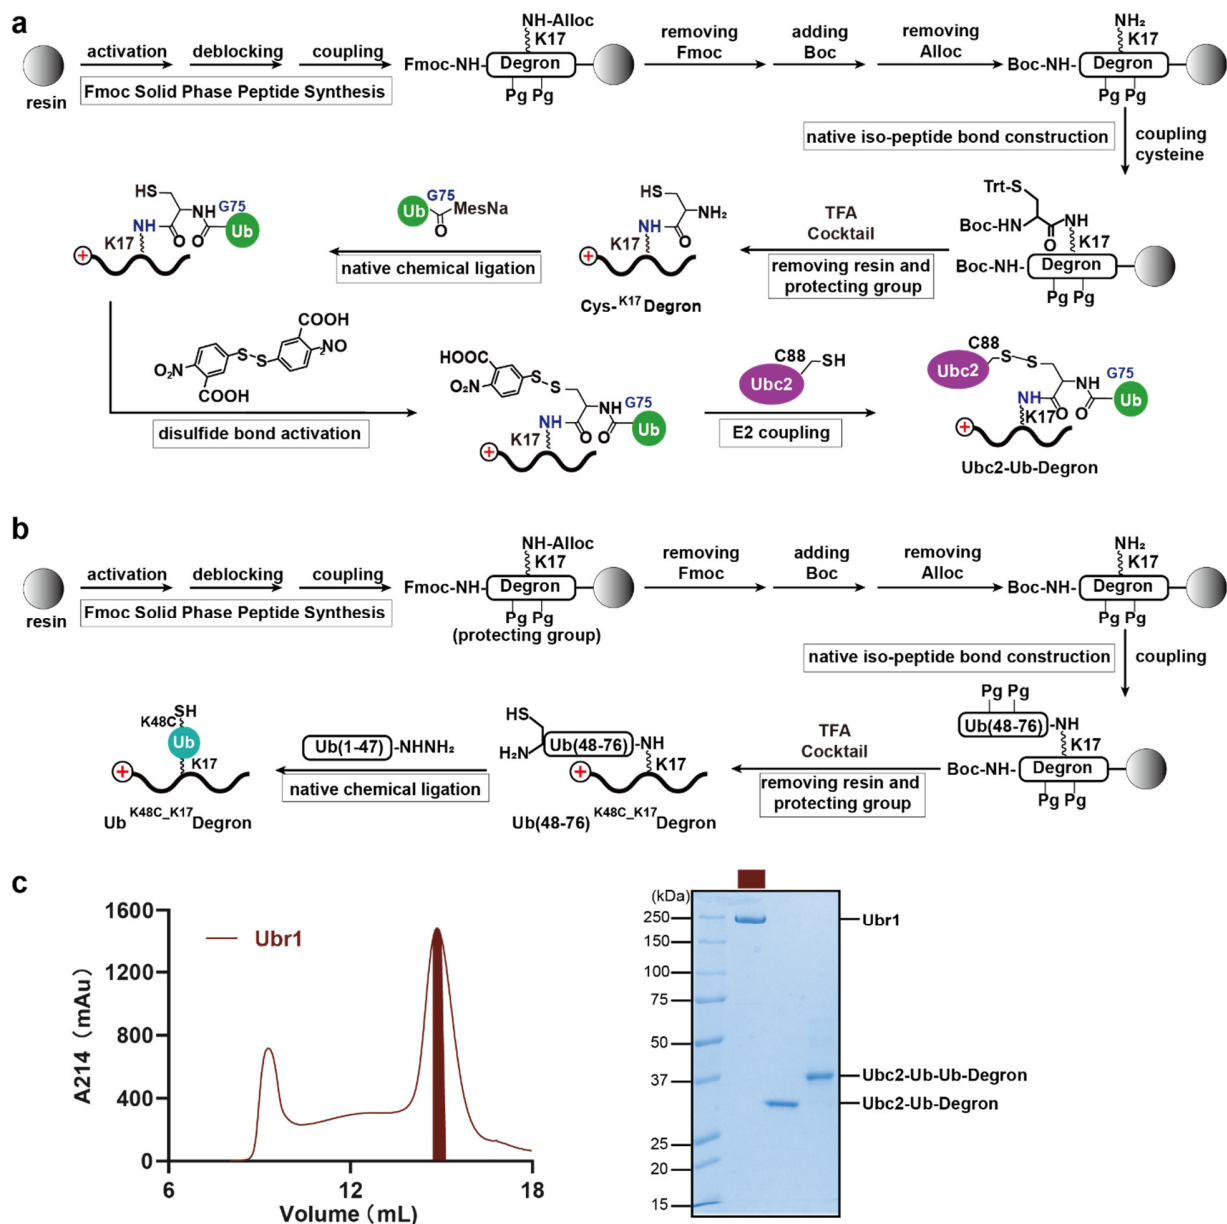

352

353

354 **Fig. S2: Synthesis and purification of the intermediate structures.**

355 **a**, The synthetic route of the designed structure mimicking the transition state of the initiation

356 **step. b**, The synthetic route of Ub(K48C)-K17 Degron. **c**, A gel filtration chromatogram of Ubr1

357 (left) and an SDS-PAGE gel of purified Ubr1 and designed stable intermediate structures Ubc2-  
358 Ub-Degron and Ubc2-Ub-Ub-Degron (right).

359

360 **FIG. S3**

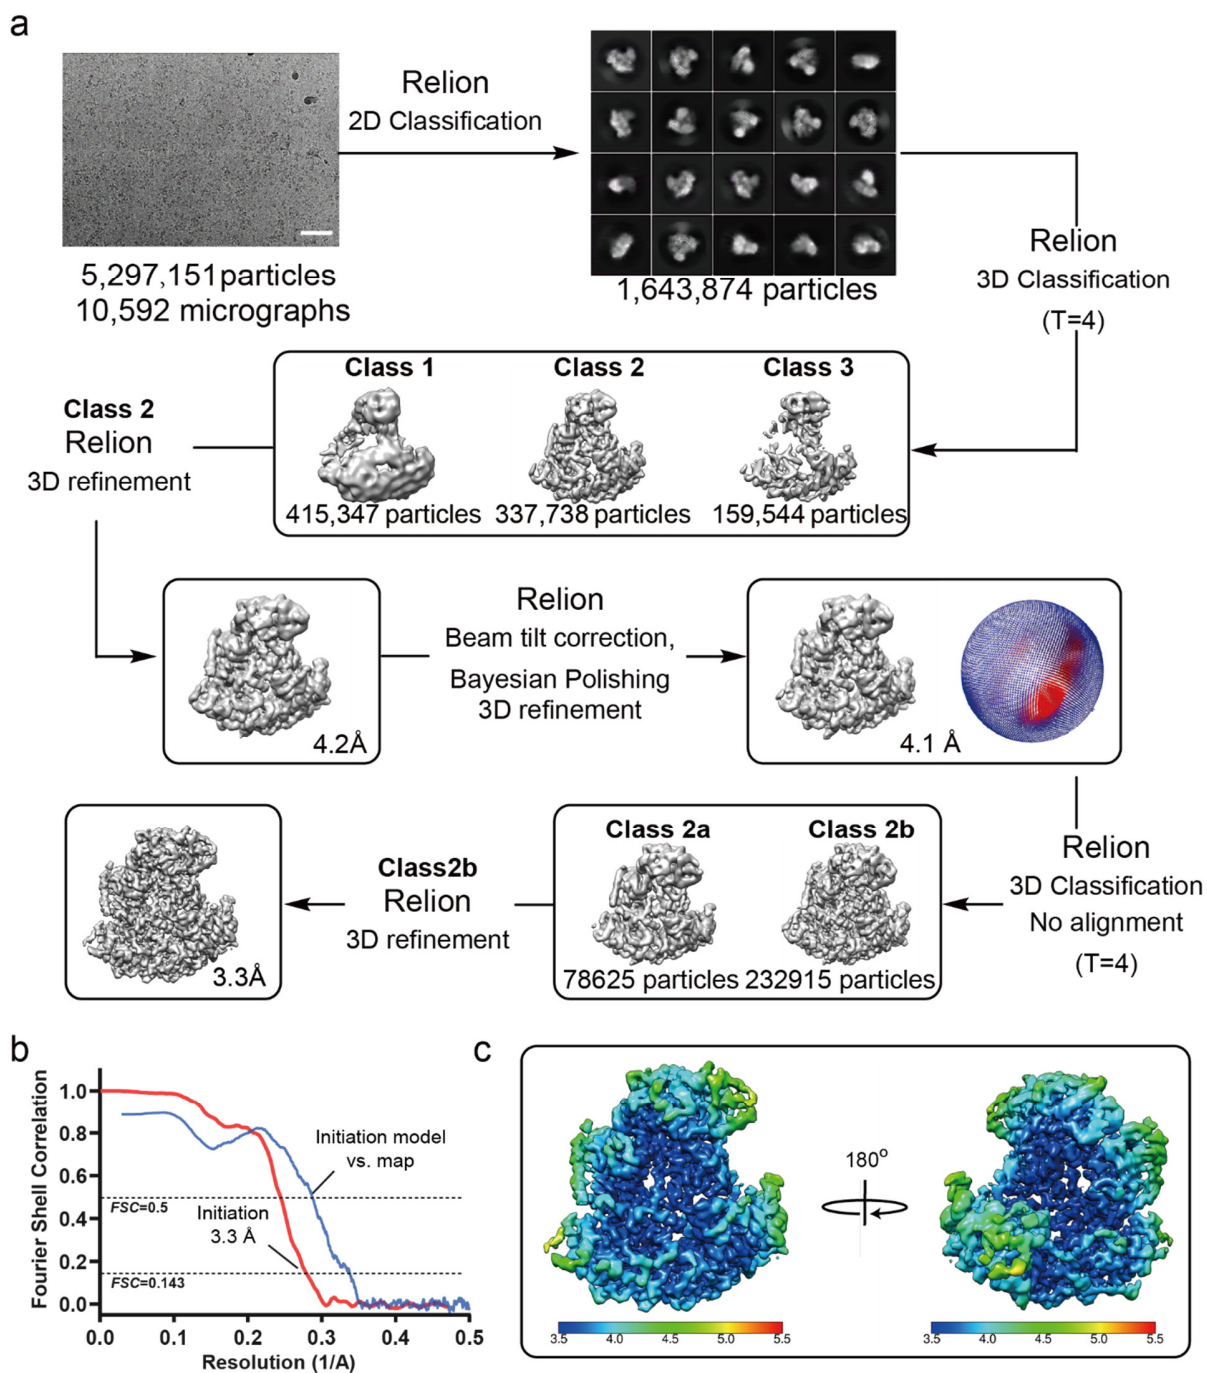

361

362

363

364 **Fig. S3: Single-particle cryo-EM analyses of the Ubr1-Ubc2-Ub-Degron dataset.**

365 **a**, The workflow of data processing. The dataset was subjected to particle selection, 2D  
366 classification, and multiple rounds of 3D classification. A representative micrograph (scale bar  
367 corresponds to 50 nm) and representative 2D class averages are shown. The distribution of the  
368 Euler angles is shown next to the map. **b**, Fourier shell correlation (FSC) curve of the masked  
369 map after Relion postprocessing. The resolution was determined by the FSC=0.143 criterion.  
370 The model vs. map FSC curve is also shown. **c**, Local resolution of the map calculated using  
371 Relion.

372



373 **FIG. S4**

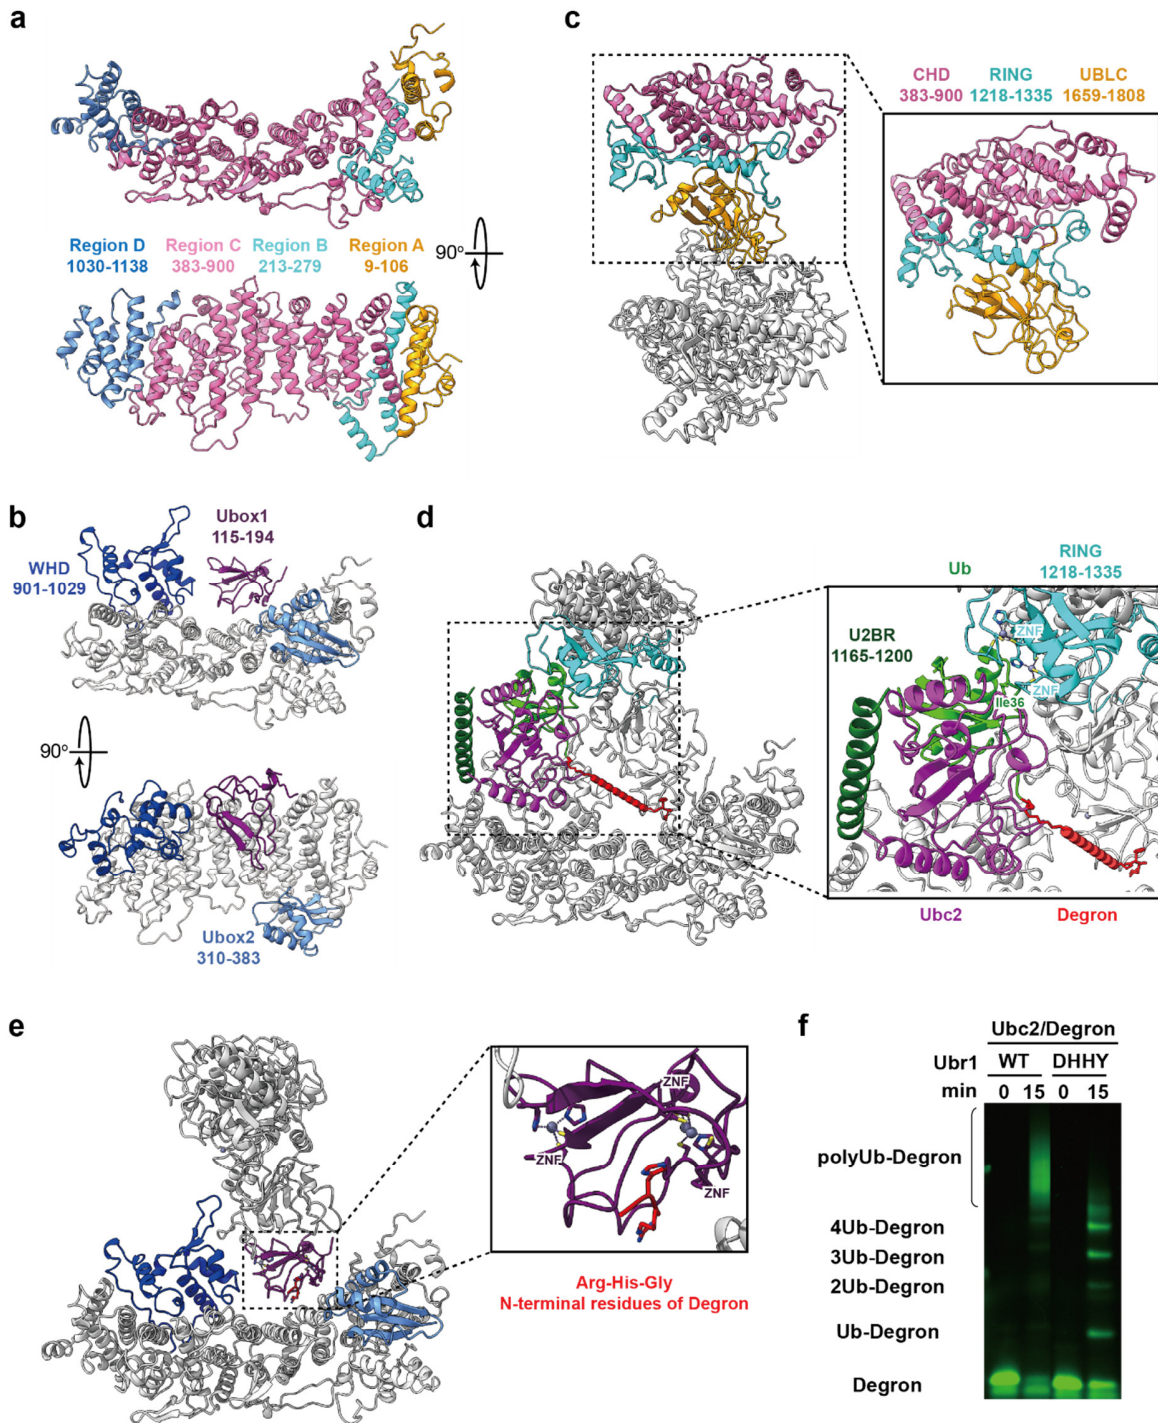

374

375

376 **Fig. S4: Structural domains of Ubr1.**

377 **a**, The helical scaffold of Ubr1 consists of four separate regions. **b**, The three domains located  
378 around the helical scaffold, Ubr-Box1 (Ubox1, purple), Ubr-Box2 (Ubox2, light blue) and winged  
379 helical domain (WHD, dark blue). **c**, The three domains above the helical scaffold, the RING  
380 finger domain (cyan), cap helical domain (pink) and UBLC domain (yellow). The RING finger  
381 domain joins the cap helical domain and UBLC domain. **d**, The U2BR (forest green), Ubc2  
382 (magenta)~Ub (lime) and RING finger domains form the catalytic module of Ubr1. **e**, A close-up  
383 view of substrate-engaged Ubr-Box1. **f**, In vitro Ubr1-dependent ubiquitination assays. A  
384 quadruple mutant of the residues involved in the interface between Ubox1, WHD, and UBLC  
385 (H161A, Y933A, D1175A, and H1763A) was tested.

386



387 **FIG. S5**

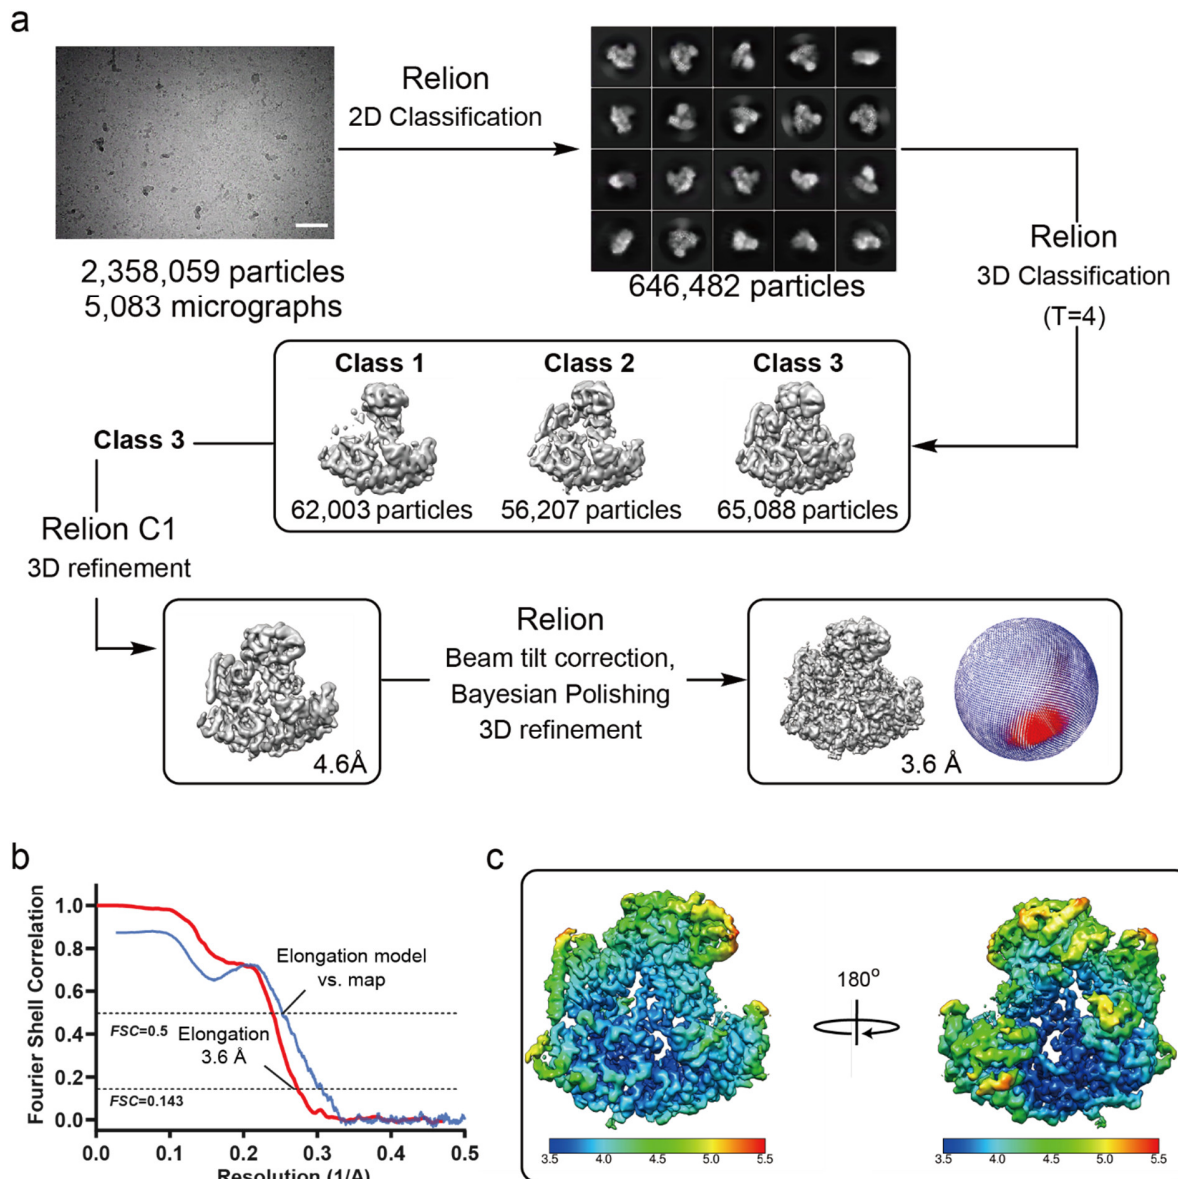

388

389 **Fig. S5: Single-particle cryo-EM analyses of the Ubr1-Ubc2-Ub-Ub-Degron dataset.**

390 **a**, The workflow of data processing. The dataset was subjected to particle selection, 2D  
391 classification, and multiple rounds of 3D classification. A representative micrograph (scale bar  
392 corresponds to 50 nm) and representative 2D class averages are shown. The distribution of the  
393 Euler angles is shown next to the map. **b**, Fourier shell correlation (FSC) curve of the masked

394 map after Relion postprocessing. The resolution was determined by the FSC=0.143 criterion.

395 The model vs. map FSC curve is also shown. **C**, Local resolution of the map calculated using

396 Relion.

397

398 **FIG. S6**

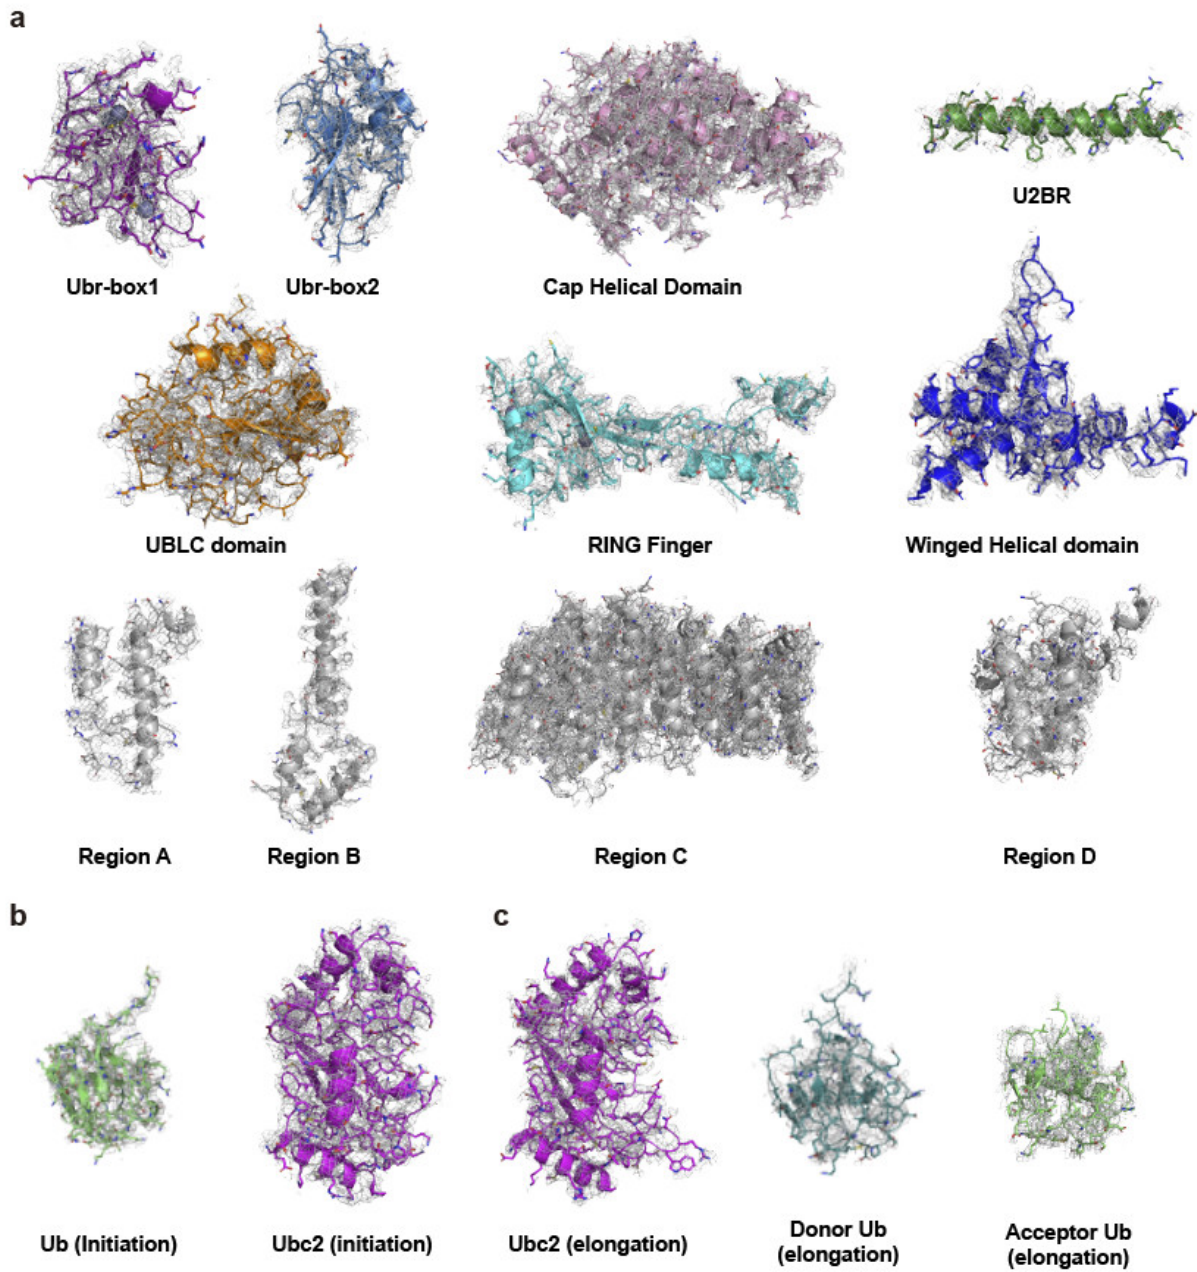

399

400

401

402

403 **Fig. S6: Representative cryo-EM densities of the initiation and elongation complexes.**

404 **a**, Individual domains in the initiation complex. **b**, Ubc2 and Ub in the initiation complex. **c**,  
405 Ubc2, donor Ub and acceptor Ub in the elongation complex. All maps were contoured at a root-  
406 mean-square deviation of 4.0.

407

408 **FIG. S7**

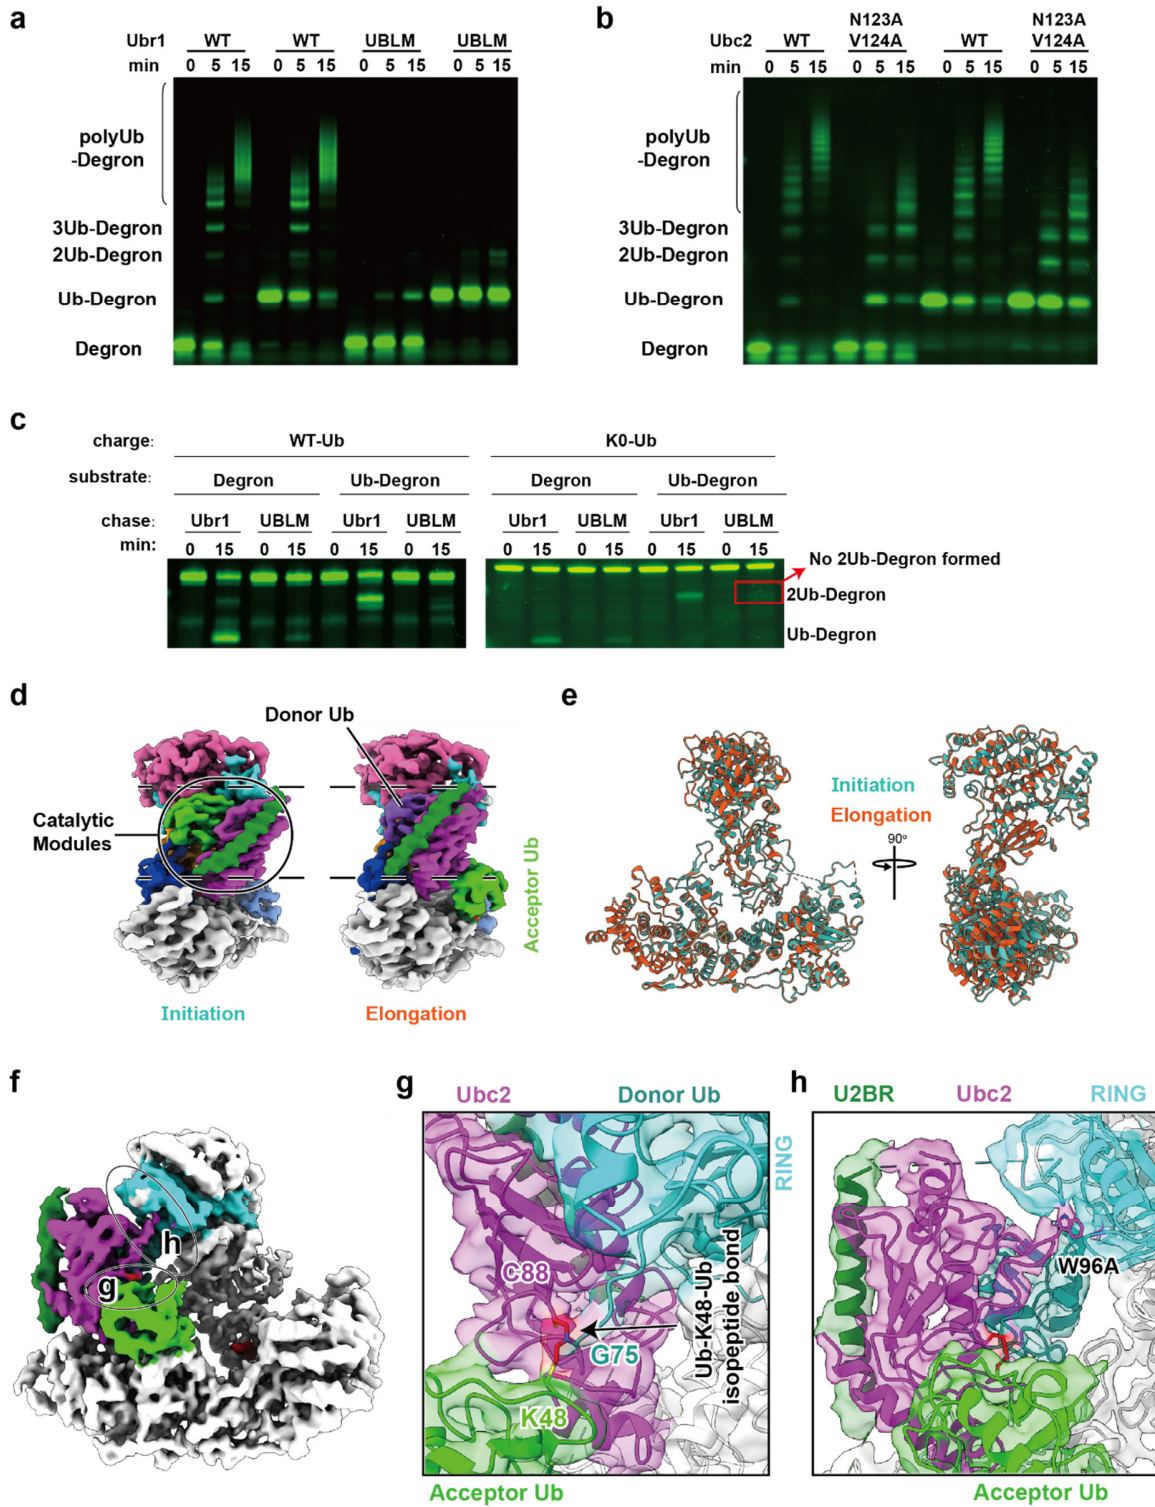

409

410 **Fig. S7: Characterization of the acceptor Ub interactions in the elongation complex.**



411 **a-b**, In vitro Ubr1-dependent ubiquitination assays. Mutations of the Ub binding loop  
412 (H678A/V679A/L680A/H681A, UBLM, panel **a**) and the Ubc2 interface (N123A/V124A, panel **b**)  
413 were tested. **c**, Single-turnover ubiquitination assay of wild-type Ubr1 and the Ubr1 mutant  
414 (UBLM) using Ubc2 charged with either wild-type Ub or K0-Ub (all lysines mutated to arginines).  
415 The red box highlights that the Ubr1 mutant (UBLM) could not mediate Ub thioester discharge  
416 from Ubc2~Ub to Ub-degron (a defect in elongation). **d**, Side views of the initiation and  
417 elongation complexes showing the displacement of U2BR and Ubc2. **e**, Alignment of Ubr1 in the  
418 initiation and elongation complexes. **f**, Structure of the elongation complex with Ubc2 (magenta),  
419 U2BR (forest green), RING finger domain (cyan), donor Ub (teal) and acceptor Ub (lime).  
420 Interfaces between Ubc2 and the acceptor Ub (**g**) and the RING finger domain (**h**) are circled. **g**,  
421 A close-up view of the interface between Ubc2 and the acceptor Ub. **h**, A close-up view of the  
422 interface between Ubc2 and the RING finger domain.

423

424 **FIG. S8**

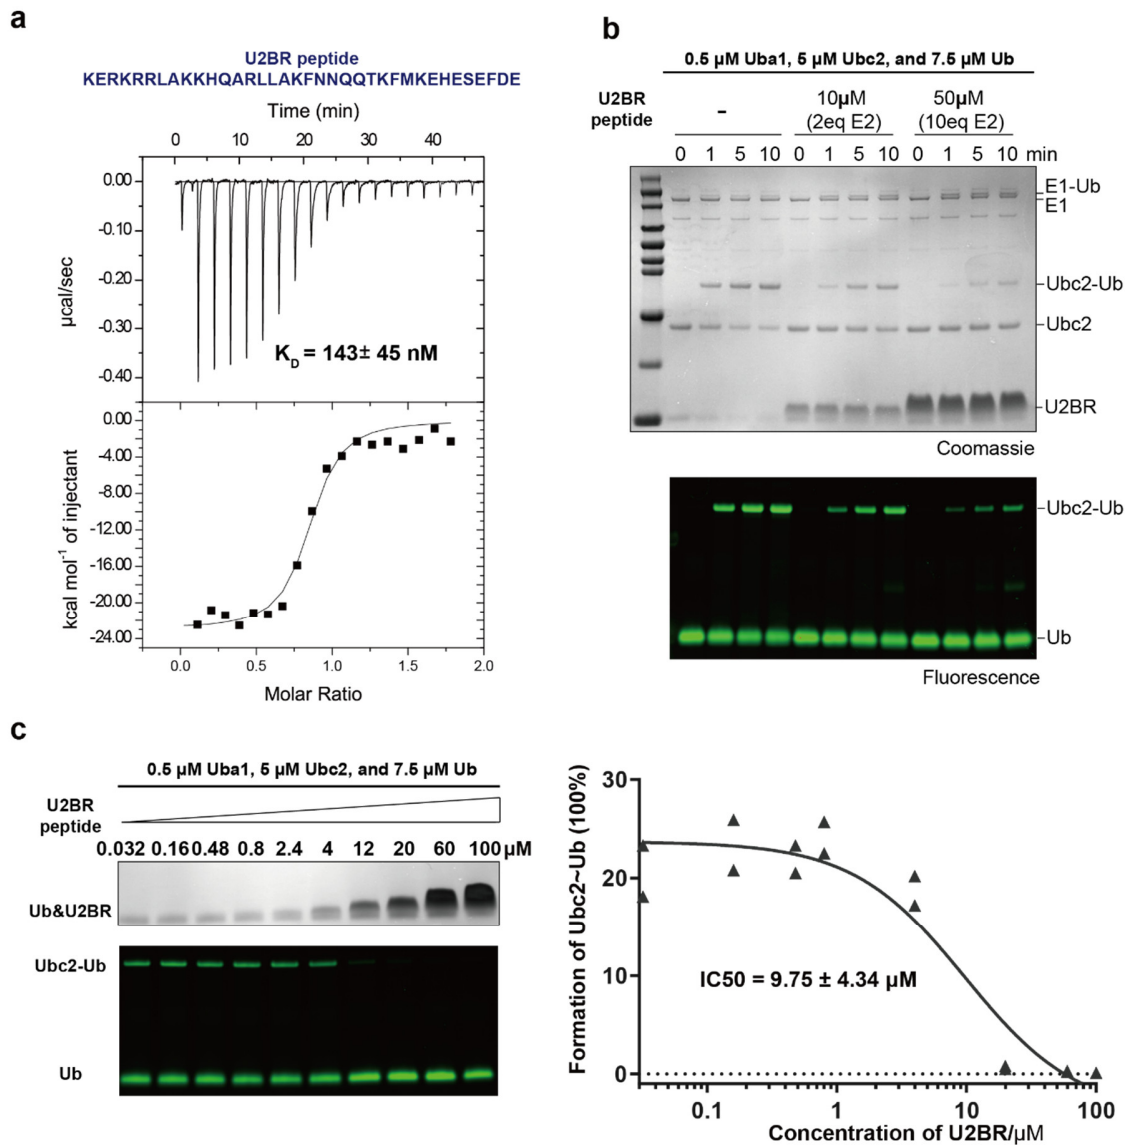

425

426 **Fig. S8: Characterization of the U2BR peptide on the enzymatic properties of Ubc2.**

427 **a**, ITC measurement of the binding between Ubc2 and a synthetic U2BR peptide. **b**, E1-

428 dependent Ubc2~Ub thioester formation in the presence of the synthetic U2BR peptide. **c**,

429 Quantitative evaluation of the inhibitory effects of the synthetic U2BR peptide on E1-dependent

430 Ubc2~Ub thioester formation. Averages of two independent experiments were plotted and fit to  
431 estimate the IC50 of the synthetic U2BR peptide.

432



433 **FIG. S9**

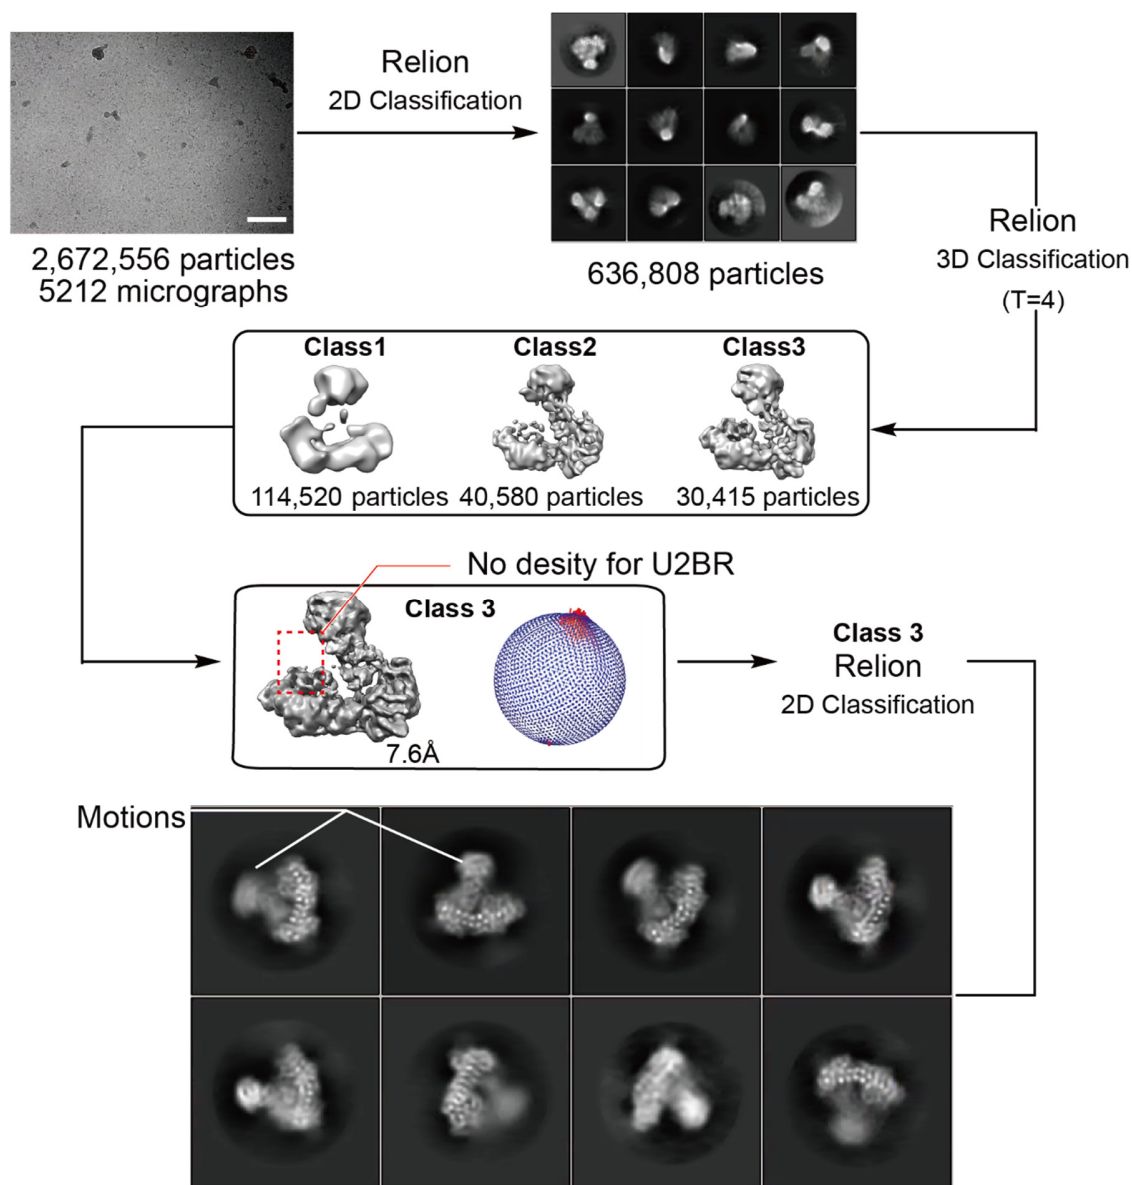

434

435 **Fig. S9: Single-particle cryo-EM analyses of Ubr1.**

436 The dataset was subjected to particle selection, 2D classification, and multiple rounds of 3D  
437 classification. A representative micrograph (scale bar corresponds to 50 nm) and representative  
438 2D class averages are shown. The distribution of the Euler angles is shown next to the map.

439

440 **Table S1: Statistics of cryo-EM data collection and processing**

|                                                  | <b>Initiation complex</b> | <b>Elongation complex</b> | <b>Apo Ubr1</b>           |
|--------------------------------------------------|---------------------------|---------------------------|---------------------------|
| Detergent                                        | FOM (0.001%)              | FOM (0.001%)              | FOM (0.001%)              |
| Microscope                                       | Krios (UChicago)          | Krios (UChicago)          | Krios (NCI)               |
| Magnification                                    | 81,000                    | 81,000                    | 81,000                    |
| Voltage (kV)                                     | 300                       | 300                       | 300                       |
| Spherical aberration (mm)                        | 2.7                       | 2.7                       | 2.7                       |
| Detector                                         | K3                        | K3                        | K3                        |
| Camera mode                                      | Super resolution counting | Super resolution counting | Super resolution counting |
| Exposure rate (e <sup>-</sup> /pixel/s)          | 15                        | 15                        | 15                        |
| Total exposure (e <sup>-</sup> /Å <sup>2</sup> ) | 50                        | 50                        | 50                        |
| Defocus range (μm)                               | -1.0 to -2.5              | -1.0 to -2.5              | -1.0 to -2.5              |
| Pixel size (Å)                                   | 1.063                     | 1.063                     | 1.122                     |
| Mode of data collection                          | Image shift               | Image shift               | Image shift               |
| Energy filter                                    | 20 eV slit                | 20 eV slit                | 20 eV slit                |
| Software for data collection                     | EPU                       | EPU                       | Latitude S                |
| Number of micrographs                            | 10,592                    | 5,083                     | 5,212                     |
| Symmetry imposed                                 | C1                        | C1                        | C1                        |
| Box size (pixel)                                 | 320                       | 320                       | 320                       |
| Initial particle images (no.)                    | 5,297,151                 | 2,358,059                 | 2,672,556                 |
| Particle images for 3D (no.)                     | 1,643,874                 | 646,482                   | 636,808                   |
| Final particle images (no.)                      | 232,915                   | 65,088                    | 30,415                    |
| Map resolution, masked (Å)                       | 3.35                      | 3.67                      | 4.56                      |
| B-factor estimated (Å <sup>2</sup> )             | 96.5                      | 96.7                      | 119.0                     |
| EMD accession code                               | 23806                     | 23807                     | -                         |

441

442

443 **Table S2: Statistics of cryo-EM model refinement and geometry**

|                         | <b>Initiation complex</b> | <b>Elongation complex</b> |
|-------------------------|---------------------------|---------------------------|
| Composition (#)         |                           |                           |
| Chains                  | 5                         | 7                         |
| Atoms                   | 15934                     | 16488                     |
| Residues                | 1967                      | 2036                      |
| Water                   | 0                         | 0                         |
| Ligands                 | ZN: 7                     | ZN: 7                     |
|                         |                           | ETE: 1 (chemical linker)  |
| Bonds (RMSD)            |                           |                           |
| Length (Å)              | 0.003                     | 0.004                     |
| Angles (°)              | 0.604                     | 0.646                     |
| MolProbity score        | 1.74                      | 1.77                      |
| Clash score             | 10.39                     | 11.19                     |
| Ramachandran plot (%)   |                           |                           |
| Outliers                | 0.00                      | 0.00                      |
| Allowed                 | 3.29                      | 3.27                      |
| Favored                 | 96.71                     | 96.73                     |
| Rotamer outliers (%)    | 0.28                      | 0.27                      |
| Cβ outliers (%)         | 0.00                      | 0.00                      |
| Peptide plane (%)       |                           |                           |
| Cis proline/general     | 0.0/0.0                   | 0.0/0.0                   |
| Twisted proline/general | 0.0/0.0                   | 0.0/0.0                   |
| CaBLAM outliers (%)     | 1.81                      | 1.5                       |
| ADP (B-factors)         |                           |                           |
| Iso/Aniso (#)           | 15934/0                   | 16488/0                   |
| min/max/mean            |                           |                           |
| Protein                 | 12.90/108.84/44.62        | 30.00/164.26/82.92        |
| Ligand                  | 53.14/105.95/73.23        | 94.39/153.23/112.90       |
| PDB accession code      | 7MEX                      | 7MEY                      |

444

445

446

## 447 **METHODS**

### 448 **Cloning and plasmid construction**

449 The plasmid containing yeast (*Saccharomyces cerevisiae*) Ubr1 was purchased from Addgene  
450 (plasmid # 24506)<sup>40</sup>. DNA sequence of yeast (*Saccharomyces cerevisiae*) Ubc2 was  
451 synthesized and codon optimized for *E. coli* overexpression by Genscript. The gene was further  
452 cloned between the NdeI and XhoI sites of the vector pET-28a containing an N-terminal His tag  
453 followed by a HRV3C protease cleavage site. Variants of Ubr1 and Ubc2 were generated using  
454 site directed mutagenesis. Human Uba1 was cloned in pET-28a vector containing an N-terminal  
455 His tag. DNA sequences of wildtype ubiquitin (Ub), Ub mutants including K48R, G76C, K0 (all 7  
456 lysine residues mutated to arginine), and AC-Ub (a Ub variant with additional two amino acids  
457 Ala-Cys at the N terminus) were synthesized and codon optimized for *E. coli* overexpression by  
458 Genscript. The genes were further cloned between the NdeI and XhoI sites of the vector pET-  
459 22b.

460

### 461 **Protein expression and purification**

462 Wildtype Ub and Ub mutants were purified as previously described<sup>41</sup>. Briefly, plasmids for  
463 overexpression were transformed to *E. coli* BL21(DE3) competent cells. The *E. coli* cells were  
464 grown in Luria broth (LB) media containing 50 µg/mL ampicillin until OD600 reached 0.8 and  
465 were induced by isopropyl β-D-1-thiogalactopyranoside (IPTG) at a final concentration of 0.4  
466 mM followed by overnight incubation at 25 °C. Cells were pelleted at 4,000 rpm for 30 min at  
467 4 °C, resuspended in ddH<sub>2</sub>O and lysed by ultra-sonication for 30 min in an ice bath. The cell  
468 lysates were supplemented with 1% perchloric acid to precipitate non-relevant proteins which  
469 were then cleared using centrifugation (30 min, 15,000×g, 4 °C). Ub and its variants were  
470 further purified using a Mono S cation exchange column (GE Healthcare), followed by dialysis  
471 into a buffer containing 50 mM HEPES, pH 7.5, and 150mM NaCl. The peak fractions were  
472 pooled and concentrated to 20 mg/ml.

473 Plasmids containing Ubc2 and its variants were transformed to *E. coli* BL21(DE3) competent  
474 cells. The *E. coli* cells were grown in LB media containing 20 µg/mL kanamycin until OD600

475 reached 0.6, and were induced by IPTG at a final concentration of 0.4 mM followed by overnight  
476 incubation at 18 °C. Cells were harvested by centrifugation at 4,000 rpm for 30 min and then  
477 lysed by sonication in the lysis buffer (50 mM HEPES, pH 7.5, 150mM NaCl, 20mM imidazole  
478 and 1mM PMSF). After centrifugation at 12,000 rpm for 30 min, the supernatant was loaded  
479 onto a Ni-NTA affinity column. The proteins were eluted with the elution buffer (50 mM HEPES,  
480 pH 7.5, 150mM NaCl, and 400mM imidazole), and further purified by a Superdex 200 size-  
481 exclusion column (GE Healthcare) equilibrated in a buffer containing 50 mM HEPES, pH 7.5,  
482 and 150 mM NaCl.

483 Yeast Ubr1 and its variants was expressed as previously described<sup>33</sup>. Briefly, single colony of  
484 yeast were grown in SD medium at 30°C until OD600 reached ~1.0. The cells were pelleted at  
485 5,000 g, washed once with cold phosphate buffer saline (PBS), and then resuspended (6 mL  
486 buffer per 1 g of pellet) in the lysis buffer (50 mM HEPES, pH 7.5, 0.15 M NaCl, protease  
487 inhibitor cocktail (Roche), 1mM PMSF, and 10% glycerol, ). The resuspended yeast cells were  
488 dropped into liquid nitrogen, and the frozen pellet balls were ground to fine powder in liquid  
489 nitrogen using a cryogenic impact grinder (SPEX™ SamplePrep 6870 Freezer/Mill). The powder  
490 was further thawed and centrifuged at 11,200 g at 4°C for 30 min. The supernatant was loaded  
491 onto anti-DYKDDDDK (FLAG) affinity resin (Thermo Scientific, #. A36803), followed by  
492 extensive wash. Finally, the FLAG-tagged Ubr1 was eluted with 1mg/mL FLAG peptide and  
493 further purified by a Superose 6 size-exclusion column (GE Healthcare) equilibrated in a buffer  
494 capturing 50 mM HEPES, pH 7.5, and 150mM NaCl.

495

## 496 **Peptide Synthesis**

497 All peptides were synthesized using standard Fmoc solid phase peptide synthesis (SPPS)  
498 protocols under standard microwave conditions (CEM Liberty Blue). Fmoc-hydrazine 2-  
499 chlorotriyl chloride PS resin and Rink Amide MBHA PS resin were used for peptides synthesis.  
500 The coupling cycle was programed as previously reported<sup>18</sup>. Briefly, 10% piperidine in DMF  
501 with 0.1 M Oxyma (1 min at 90 °C) was applied as deprotection condition, and 4-fold of 0.2 M  
502 Fmoc-protected amino acid, 1.0 M DIC, and 1.0 M Oxyma in DMF (10 min at 50 °C for His and

503 Cys, 90 °C for other residues were applied as amino acid coupling condition. Specifically, in  
504 peptide Ub(46-76)-<sup>K17</sup>Degron-NH<sub>2</sub> and Ub(48-76)-<sup>K17</sup>Degron-NH<sub>2</sub>, Fmoc-Lys (Alloc)-OH was  
505 coupled at position 17 for the orthogonal protection. When the backbone coupling was finished,  
506 the Alloc protecting group was removed by [(Ph<sub>3</sub>P)<sub>4</sub>Pd/Ph<sub>3</sub>SiH as previously described <sup>42</sup>, and  
507 then the ε-amino group on Lys17 can be further coupled with successive sequence (Ub48-76)  
508 or (Ub46-76). After the completion of SPPS, the resulting peptide-resin was cleaved in cleavage  
509 cocktail (87% trifluoroacetic acid, 5% water, 5% thioanisole, 3% 1,2-ethanedithiol) for 2 h at  
510 25 °C. Crude peptides were precipitated with cold diethyl ether, analyzed and purified by  
511 reversed-phase high-performance liquid chromatography (RP-HPLC).

512

### 513 **Preparation of fluorescence labeled Degron and Ub-Degron**

514 Degron was direct obtained from SPPS as described above. K17-linked mono ubiquitinated  
515 degron (Ub-<sup>K17</sup>Degron) was synthesized from two fragments, Ub(1-45)-NHNH<sub>2</sub> and Ub(46-76)-  
516 <sup>K17</sup>Degron-NH<sub>2</sub>. Ala46 in the latter fragment was temporally mutated to Cys to enable native  
517 chemical ligation of these two fragments. After ligation the thiol group of Cys46 was removed  
518 through desulfurization reaction to produce the native Ala46 as shown in Fig S1b. For  
519 fluorescence labeling of Degron, we introduced an additional Cys at the C-terminus of Degron to  
520 enable site-specific labeling. In the Ub-Degron case, a Cys(Acm) was introduced in the C-  
521 terminus of Degron to orthogonally protect this thiol group from being desulfurized. After  
522 purification, the Acm group was removed from the obtained Ub-Degron-Cys(Acm) to free the  
523 thiol group for labeling. For labeling reaction, 2 mg lyophilized dry power of Degron-Cys or Ub-  
524 Degron-Cys was dissolved in 50 mM HEPES, 150mM NaCl, pH 7.5. Then 2 equivalents of  
525 fluorescein-5-maleimide (Invitrogen, #F150) was added and the mixture was incubated at room  
526 temperature for 20 min, followed by buffer exchange in (50 mM HEPES, 150mM NaCl, pH 7.5)  
527 using a Superdex peptide size-exclusion column (GE Healthcare) to give the fluorescence  
528 labeled degron and Ub-degdon.

529

### 530 **Ubiquitination assay with fluorescent Degron or Ub-Degron**

531 In vitro ubiquitination assays were performed with 0.1  $\mu$ M Uba1, 4  $\mu$ M Ubc2, 0.25  $\mu$ M Ubr1, 5  
532  $\mu$ M fluorescent Degron or Ub-Degron, and 80  $\mu$ M Ub at 30 °C in the reaction buffer (50 mM  
533 HEPES pH 7.5, 0.15 M NaCl, 10 mM MgCl<sub>2</sub>, and 5 mM ATP). The reactions were terminated by  
534 adding 4 × SDS-sample buffer, followed by SDS-PAGE. Unless indicated otherwise, same  
535 concentrations of Ubr1 and Ubc2 variants as the respective wildtype were used in the assay.  
536

### 537 **Single-turnover measurement of Ub transfer in the initiation and elongation steps**

538 To monitor the single-turnover of Ub transfer in the initiation step, i.e., Ubr1 transfers Ubc2~Ub  
539 to Degron, a pulse-chase experiment that eliminates the effects of UBA1-dependent formation  
540 of Ubc2~Ub intermediate was performed. The pulse reaction generated a thioester-linked  
541 Ubc2~Ub intermediate with 5  $\mu$ M Ubc2, 7.5  $\mu$ M fluorescent Ub, 0.5  $\mu$ M UBA1 in a buffer  
542 containing 50 mM HEPES pH 8.0, 150 mM NaCl, 10 mM MgCl<sub>2</sub>, and 10 mM ATP. The reaction  
543 mixture was incubated at room temperature for 10 min, and quenched with 50 mM EDTA on ice  
544 for 5 min. A final concentration of 0.5  $\mu$ M Ubr1 and 25  $\mu$ M fluorescently labeled Degron was  
545 added for the chase reaction which was then incubated at 30°C for 5 minutes. The reaction was  
546 stopped by in 2× SDS-sample buffer (pH < 3), followed by SDS-PAGE. Same concentrations of  
547 Ubr1 and Ubc2 variants as the respective wildtype were used. The experimental setup for the  
548 elongation step was similar to the initiation step, except that fluorescently labeled Ub-Degron  
549 was used instead of Degron.  
550

### 551 **Michaelis-Menten constant (K<sub>m</sub>) measurement of the initiation and elongation steps**

552 For K<sub>m</sub> measurement of the initiation step, two prepared mixtures are required. Mixture 1  
553 consists of Uba1 and Ub (K48R), and Mixture 2 consists of Ubr1 and fluorescently labelled  
554 Degron. Both mixtures were prepared in the reaction buffer (50 mM HEPES pH 7.5, 150 mM  
555 NaCl, 10 mM MgCl<sub>2</sub>, and 5 mM ATP). Ubc2 was prepared as a twofold dilution series from the  
556 stock, and then introduced into the solution containing equal amounts of the 2 mixtures to  
557 initiate the reaction. The final concentrations were 80  $\mu$ M Ub (K48R), 0.1  $\mu$ M Uba1, 0.25  $\mu$ M  
558 Ubr1 and 5  $\mu$ M fluorescently labelled Degron. Reactions were quenched after 1 minute at 30°C



559 using 2 × SDS-sample buffer, followed by SDS-PAGE. The gels were imaged on ChemiDoc MP  
560 Imaging System. Substrate and product bands were individually quantified as a percentage of  
561 the total signal for each time point using ImageLab (Bio-Rad). Ratios of ubiquitinated products  
562 relative to the total signal were plotted against the concentration of Ubc2 and fit to the  
563 Michaelis–Menten equation to estimate  $K_m$  in GraphPad Prism 8. The experimental setup for  $K_m$   
564 measurement of the elongation step was similar, except that fluorescently labeled Ub-Degron  
565 was used instead of Degron.

566

## 567 **Generation of the stable complex mimicking the transition state of the initiation step**

### 568 **1. Preparation of Ub(1-75) hydrazide**

569 Ub(1-75) hydrazide (Ub75-NH<sub>2</sub>) were generated using previously reported protein  
570 hydrazinolysis method<sup>41</sup>. In brief, Ub(G76C) of which Gly76 at the C-terminus was mutated to  
571 Cys could undergo N-S acyl transfer so that hydrazine could be used as a suitable nucleophile,  
572 leading to a reliable C-terminal hydrazinolysis. 20 mg/mL Ub(G76C), 5 mg/mL TCEP, 50 mg/mL  
573 NHNH<sub>2</sub>·HCl, and 100 mg/mL MesNa were mixed in 20 mM Tris, pH 6.5, and stirred at 60 rpm  
574 and 50°C for 24 hours. The final products were purified and analyzed by RP-HPLC.

### 575 **2. Preparation of Ub(G76C)-<sup>K17</sup>Degron**

576 The reaction scheme was shown in Fig. S3a. In brief, Ub75-NH<sub>2</sub> peptide (1 μmol, 1 equiv)  
577 was dissolved in 1mL ligation buffer (6 M guanidinium chloride, 100 mM NaH<sub>2</sub>PO<sub>4</sub>, pH 2.3)  
578 precooled to -15 °C. Then 10 μL 1 M NaNO<sub>2</sub> (10 μmol, 10 equiv) was added, and the reaction  
579 was stirred for 30 min at -15 °C to fully convert the hydrazide to the acyl azide. Next, sodium 2-  
580 mercaptoethanesulfonate (MesNa, 100 μmol, 100 equiv) was added, and the pH was adjusted  
581 to 5.0 for overnight reaction. The product, Ub75-MesNa, was further purified by RP-HPLC.  
582 Purified Ub1-75-MesNa (1 μmol, 1 equiv) and Cys-<sup>K17</sup>Degron peptide (1.1 μmol, 1.1 equiv) were  
583 mixed to the ligation buffer (6 M guanidinium chloride, 100 mM NaH<sub>2</sub>PO<sub>4</sub>, 5mg/mL TCEP, pH  
584 7.4). Next, 4-mercaptophenylacetic acid (MPAA, 50 μmol, 50 equiv) was added, and the pH was

585 adjusted to 6.4 for overnight reaction. The final product, Ub(G76C)-<sup>K17</sup>Degron, was purified and  
586 analyzed by RP-HPLC.

### 587 **3. Preparation of Ubc2-Ub(G76C)-<sup>K17</sup>Degron through disulfide ligation**

588 Lyophilized dry power of Ub(G76C)-<sup>K17</sup>Degron (1.3 mg) was dissolved in 100  $\mu$ L 6 M  
589 guanidinium chloride, 50 mM HEPES, pH 7.5 to a final concentration of 1mM. 2  $\mu$ L of 100 mM  
590 5,5'-dithiobis-(2-nitrobenzoic acid) (Sigma Aldrich, dissolved in 50 mM NaH<sub>2</sub>PO<sub>4</sub>, pH 7.5) was  
591 immediately added and fully mixed by pipetting before incubating at room temperature for 20  
592 min. The solution was then diluted to the refolding buffer containing 50 mM HEPES pH7.5,  
593 150mM NaCl. Excess reactants were removed by a Superdex peptide size-exclusion column  
594 (GE Healthcare) equilibrated in the refolding buffer. Finally, the product and 0.9 equiv Ubc2  
595 (pre-dialyzed into the refolding buffer) were mixed and incubated at room temperature for 30  
596 min. The final product was purified and analyzed by RP-HPLC.

597

### 598 **Generation of the stable complex mimicking the transition state of the elongation step**

#### 599 **1. Preparation of Molecule 2**

600 As shown in Fig. 2b, **Molecule 2** was prepared using Cys-aminoethylation reaction<sup>36</sup>.  
601 Specifically, 1  $\mu$ mol lyophilized powder of Ubc2 was incubated in aqueous alkylation buffer (6 M  
602 guanidinium chloride, 0.1 M HEPES pH 8.5, 5 mg/mL TCEP) with 40 mM **Molecule 1** (2-((2-  
603 chloroethyl)amino)ethane-1-(S-acetaminomethyl)thiol) at 37 °C for 14-16 h. The product,  
604 **Molecule 2**, was further purified by semi-preparative HPLC and lyophilized.

#### 605 **2. Preparation of Molecule 3**

606 Lyophilized **Molecule 2** was dissolved in reaction buffer containing 6 M guanidinium chloride,  
607 0.1 M NaH<sub>2</sub>PO<sub>4</sub> buffer, pH 7.4 at a final concentration of 1 mM. Then PdCl<sub>2</sub> (15 equiv, pre-  
608 dissolved in the reaction buffer) was added and the mixture was incubated at 37°C for 1 h to  
609 remove the AcM group. Purified Ub(1-75)-MesNa (1  $\mu$ mol, 1 equiv) and Molecule 2 (1.1  $\mu$ mol,  
610 1.1 equiv) were then mixed in the ligation buffer (6 M guanidinium chloride, 100 mM NaH<sub>2</sub>PO<sub>4</sub>,  
611 5mg/ml TCEP, pH 7.4). Next, 4-mercaptophenylacetic acid (MPAA, 50  $\mu$ mol, 50 equiv) was

612 added, and the pH was adjusted to 6.4 to initiate native chemical ligation. The product was  
613 purified and analyzed by RP-HPLC.

### 614 3. Preparation of Ub<sup>K48C\_K17</sup>Degron

615 Different from the preparation strategy for Ub-Degron, we mutated the Lys48 to Cys, which  
616 enabled native chemical ligation. Furthermore, the thiol group on Cys48 was retained for  
617 disulfide ligation. Specifically, Ub(1-47)NHNH<sub>2</sub> peptide (1 μmol, 1 equiv) was dissolved in 1mL  
618 ligation buffer (6 M guanidinium chloride, 100 mM NaH<sub>2</sub>PO<sub>4</sub>, pH 2.3) precooled to -15 °C. Then,  
619 10 μL 1 M NaNO<sub>2</sub> (10 μmol, 10 equiv) was added, and the reaction was stirred for 30 min at -  
620 15 °C to fully convert the hydrazide to acyl azide. Next, Ub(48-76)<sup>K48C\_K17</sup>Degron peptide (1.1  
621 μmol, 1.1 equiv) was added to the ligation buffer, followed by 4-mercaptophenylacetic acid  
622 (MPAA, 50 μmol, 50 equiv). The pH was adjusted to 6.4 to initiate the ligation. The product,  
623 Ub<sup>K48C\_K17</sup>Degron, was purified and analyzed by RP-HPLC.

### 624 4. Preparation of Ubc2-Ub-Ub<sup>K48C\_K17</sup>Degron using disulfide ligation

625 Lyophilized dry power of **Molecular 3** was dissolved in 500ul 6 M guanidinium chloride, 50mM  
626 HEPES, 1mM TCEP, pH7.5, and refolded through gradient dialysis against refolding buffer  
627 (50mM HEPES, 1mM TCEP, pH7.5) containing 6M, 2M, 1M to 0M guanidinium chloride. 1.3mg  
628 Lyophilized dry power of **Ub<sup>K48C\_K17</sup>Degron** was dissolved in 100 μl 6 M guanidinium chloride,  
629 50mM HEPES, pH7.5 (the final concentration was 1mM), and then 2μl 100mM 5,5' -dithiobis-  
630 (2-nitrobenzoic acid) (Sigma Aldrich, dissolved in 50 mM NaH<sub>2</sub>PO<sub>4</sub> pH 7.5) was added and fully  
631 mixed by pipetting before incubating at room temperature for 20 min. The solution was then  
632 diluted to the refolding buffer, and the excess small molecular was removed by Superdex  
633 peptide size-exclusion column (GE Healthcare) equilibrated in refolding buffer. Finally, the  
634 pooled product and 1.1eq refolded **Molecular 3** were mixed and incubated at room temperature  
635 for 30 min. The final product, **Ubc2-Ub-Ub<sup>K48C\_K17</sup>Degron**, was purified and analyzed by RP-  
636 HPLC.

637

### 638 Specimen preparation for single-particle cryo-EM

639 Ubr1 (0.4 mg/mL) was mixed with 1.2-fold excess (molar ratio) initiation or elongation  
640 intermediate-mimics and incubated on ice for 30 min. A final concentration of 0.01% fluorinated  
641 octyl maltoside (FOM) was immediately added to the sample before grid freezing using a  
642 Vitrobot mark IV (Thermo Fisher) operating at 8 °C and 100% humidity. A volume of 3.5  $\mu$ L  
643 sample was applied to a glow-discharged Quantifoil Cu 1.2/1.3 grid, and blotted for 1 second  
644 using standard Vitrobot filter paper (Ted Pella, 47000-100) before plunge freezing in liquid  
645 ethane.

646

#### 647 **Data collection for single-particle cryo-EM**

648 Optimized frozen grids were sent to Advanced Electron Microscopy Facility at the University of  
649 Chicago or National Cryo-Electron Microscopy Facility at National Cancer Institute for data  
650 collection. All datasets were acquired as movie stacks with a Titan Krios electron microscope  
651 (Thermo Scientific) operating at 300 kV, equipped with a Gatan K3 direct detection camera. A  
652 single stack consists of 40 frames with a total exposure around 50 electrons/ $\text{\AA}^2$ . The defocus  
653 range was set at -1.0 to -2.5  $\mu$ m. See **Table S1** for the details.

654

#### 655 **Image processing**

656 Movie stacks were subjected to motion correction using MotionCor2<sup>43</sup>. CTF parameters for  
657 each micrograph were determined by CTFFIND4<sup>44</sup>. The following particle picking, two- and  
658 three-dimensional classifications, and three-dimensional refinement were performed in RELION-  
659 3<sup>23</sup>. About 2,000 particles were manually picked to generate 2D class averages. The class  
660 averages were then used as templates for the following automatic particle picking. False-  
661 positive particles or particles classified in poorly defined classes were discarded after 2D  
662 classification. Initial 3D classification was performed on a binned dataset using the initial model  
663 obtained in RELION. The detailed data processing flows are shown in Figs. S3 and 5. Data  
664 processing statistics are summarized in **Table S1**. Reported resolutions are based on Fourier

665 shell correlation (FSC) using the FSC=0.143 criterion. Local resolution was determined using  
666 the implementation in RELION.

667

### 668 **Model Building, Refinement, and Validation**

669 Ubr1 is a single-subunit E3 with more than 1,900 amino acids. Only was the structure of Ubr-  
670 Box1 domain determined previously <sup>24</sup>. To overcome the difficulty during model building, we  
671 used artificial intelligence (AI) based DeepTracer program <sup>25</sup> to build a starting model of the  
672 entire complex. Specifically, sharpened map of the initiation complex and the fasta sequences  
673 of Ubr1, Ubc2, and Ub were input to the online server of DeepTracer  
674 (<https://deept racer.uw.edu/home>). The program finished within 10 minutes and output a  
675 complete model with Ubc2, and Ub correctly positioned. About 80% of Ubr1 was also correctly  
676 built into the cryo-EM map, with some errors in the poorly resolved regions and zinc binding  
677 sites. The starting model was first refined in real space using PHENIX <sup>27</sup>, and then manually  
678 fixed, adjusted and refined using COOT <sup>26</sup>. In the end, about 1800 residues of Ubr1 were built.  
679 The registration of the main chain was carefully checked and fixed based on bulky residues.  
680 The entire procedure was greatly simplified with the starting model from DeepTracer. The final  
681 model was refined again in real space using PHENIX <sup>27</sup>. The statistics of model refinement and  
682 geometry is shown in **Table S2**.

683

### 684 **Ubc2~Ub thioester formation in the presence of U2BR peptide**

685 First, 0.5  $\mu$ M Uba1, 5  $\mu$ M Ubc2, and 7.5  $\mu$ M fluorescently labeled Ub was mixed in the reaction  
686 buffer containing 50 mM HEPES pH 8.0, and 150 mM NaCl. U2BR peptide was prepared as a  
687 twofold dilution series from the stock and added to the reaction mixture. Prepared ATP·Mg<sup>2+</sup>  
688 mixture (50 mM MgCl<sub>2</sub>, 50 mM ATP, pH 8.0) was added to initiate the Ubc2~Ub thioester  
689 formation. Reactions were quenched after 1 minute at 30 °C using 2 × SDS-sample buffer (pH <  
690 3), followed by SDS-PAGE. The gels were imaged on ChemiDoc MP Imaging System, and  
691 substrate and product bands were quantified respectively as a percentage of the total signal for

692 each time point using ImageLab (Bio-Rad). Ratio of ubiquitylated products relative to the total  
693 signal was plotted against the concentrations of Ubc2 and fit to the inhibitor vs. response model  
694 (three parameters) in GraphPad Prism 8.

695

#### 696 **Isothermal titration calorimetry (ITC) analysis**

697 All reported isothermal titration calorimetry data were collected using a MicroCal ITC 200  
698 instrument in the center of biomedical analysis, Tsinghua University. Ubc2 and all U2BR  
699 peptides were buffer exchanged to 50 mM HEPES pH 7.5, and 150 mM NaCl before the  
700 experiment. For the experiments, 20  $\mu$ M Ubc2 solution in the sample cell was titrated with 400  
701  $\mu$ M U2BR peptide solution through 19 injections (2.0  $\mu$ L each) at 25 °C and 750 rpm stirring  
702 speed. Data fitting and analysis was performed using Origin 7 SR4 (OriginLab).

703

704 **REFERENCES**

- 705 1. Komander, D. & Rape, M. The Ubiquitin Code. *Annu. Rev. Biochem.* **81**, 203-229  
706 (2012).
- 707 2. Yau, R. & Rape, M. The increasing complexity of the ubiquitin code. *Nat. Cell Biol.* **18**,  
708 579-586 (2016).
- 709 3. Chau, V., Tobias, J. W., Bachmair, A., Marriott, D., Ecker, D. J., Gonda, D. K., &  
710 Varshavsky, A. A Multiubiquitin Chain Is Confined to Specific Lysine in a Targeted Short-  
711 Lived Protein. *Science* **243**, 1576-1583 (1989).
- 712 4. Chen, S.J., Wu, X., Wadas, B., Oh, J.H. & Varshavsky, A. An N-end rule pathway that  
713 recognizes proline and destroys gluconeogenic enzymes. *Science* **355**, 6323 (2017).
- 714 5. Kim, J.M., Seok, O.H., Ju, S., Heo, J.E., Yeom, J., Kim, D.S., Yoo, J.Y., Varshavsky, A.,  
715 Lee, C. & Hwang, C.S. Formyl-methionine as an N-degron of a eukaryotic N-end rule  
716 pathway. *Science* **362**, eaat0174. (2018).
- 717 6. Tasaki, T., Sriram, S.M., Park, K.S. & Kwon, Y.T. The N-end rule pathway. *Annu. Rev.*  
718 *Biochem.* **81**, 261-289 (2012).
- 719 7. Rusnac, D.V., Lin, H.C., Canzani, D., Tien, K.X., Hinds, T.R., Tsue, A.F., Bush, M.F.,  
720 Yen, H.C.S. & Zheng, N. Recognition of the Diglycine C-End Degron by CRL2(KLHDC2)  
721 Ubiquitin Ligase. *Mol. Cell* **72**, 813-822 (2018).
- 722 8. Varshavsky, A. The N-end rule pathway and regulation by proteolysis. *Protein Sci.* **20**,  
723 1298-1345 (2011).
- 724 9. Zenker, M., Mayerle, J., Lerch, M. M., Tagariello, A., Zerres, K., Durie, P. R., ... & Reis,  
725 A. Deficiency of UBR1, a ubiquitin ligase of the N-end rule pathway, causes pancreatic  
726 dysfunction, malformations and mental retardation (Johanson-Blizzard syndrome). *Nat.*  
727 *Genet.* **37**, 1345-1350 (2005).
- 728 10. Dougan, D.A. & Varshavsky, A. Understanding the Pro/N-end rule pathway. *Nat. Chem.*  
729 *Biol.* **14**, 415-416 (2018).
- 730 11. Hwang, C.S., Shemorry, A., Auerbach, D. & Varshavsky, A. The N-end rule pathway is  
731 mediated by a complex of the RING-type Ubr1 and HECT-type Ufd4 ubiquitin ligases.  
732 *Nat. Cell Biol.* **12**, 1177-1185 (2010).
- 733 12. Tasaki, T., Zakrzewska, A., Dudgeon, D. D., Jiang, Y., Lazo, J. S., & Kwon, Y. T. The  
734 substrate recognition domains of the N-end rule pathway. *J. Biol. Chem.* **284**, 1884-1895  
735 (2009).
- 736 13. Upadhyay, A., Joshi, V., Amanullah, A., Mishra, R., Arora, N., Prasad, A., & Mishra, A.  
737 E3 Ubiquitin Ligases Neurobiological Mechanisms: Development to Degeneration. *Front.*  
738 *Mol. Neurosci.* **10**, 151 (2017).
- 739 14. Bartel, B., Wunning, I. & Varshavsky, A. The recognition component of the N-end rule  
740 pathway. *EMBO. J.* **9**, 3179-3189 (1990).
- 741 15. Bodnar, N.O. & Rapoport, T.A. Molecular Mechanism of Substrate Processing by the  
742 Cdc48 ATPase Complex. *Cell* **169**, 722-735 (2017).
- 743 16. Verma, R., Mohl, D. & Deshaies, R.J. Harnessing the Power of Proteolysis for Targeted  
744 Protein Inactivation. *Mol. Cell* **77**, 446-460 (2020).
- 745 17. Burslem, G.M. & Crews, C.M. Proteolysis-Targeting Chimeras as Therapeutics and  
746 Tools for Biological Discovery. *Cell* **181**, 102-114 (2020).
- 747 18. Pan, M., Gao, S., Zheng, Y., Tan, X., Lan, H., Tan, X., Sun, D., Lu, L., Wang, T., Zheng,  
748 Q. and Huang, Y., Wang, J. & Liu, L. Quasi-Racemic X-ray Structures of K27-Linked  
749 Ubiquitin Chains Prepared by Total Chemical Synthesis. *J. Am. Chem. Soc.* **138**, 7429-  
750 7435 (2016).
- 751 19. Petroski, M.D. & Deshaies, R.J. Mechanism of lysine 48-linked ubiquitin-chain synthesis  
752 by the cullin-RING ubiquitin-ligase complex SCF-Cdc34. *Cell* **123**, 1107-1120 (2005).



- 753 20. Saha, A. & Deshaies, R.J. Multimodal Activation of the Ubiquitin Ligase SCF by Nedd8  
754 Conjugation. *Mol. Cell* **32**, 21-31 (2008).
- 755 21. Baek, K., Krist, D. T., Prabu, J. R., Hill, S., Klügel, M., Neumaier, L. M., ... & Schulman,  
756 B. A. NEDD8 nucleates a multivalent cullin-RING-UBE2D ubiquitin ligation assembly.  
757 *Nature* **578**, 461-466 (2020).
- 758 22. Horn-Ghetko, D., Krist, D. T., Prabu, J. R., Baek, K., Mulder, M. P., Klügel, M., ... &  
759 Schulman, B. A Ubiquitin ligation to F-box protein targets by SCF-RBR E3-E3 super-  
760 assembly. *Nature* **590**, 671-676 (2021).
- 761 23. Zivanov, J., Nakane, T., Forsberg, B. O., Kimanius, D., Hagen, W. J., Lindahl, E., &  
762 Scheres, S. H. New tools for automated high-resolution cryo-EM structure determination  
763 in RELION-3. *Elife* **7**, e42166 (2018).
- 764 24. Matta-Camacho, E., Kozlov, G., Li, F.F. & Gehring, K. Structural basis of substrate  
765 recognition and specificity in the N-end rule pathway. *Nat. Struct. Mol. Biol.* **17**, 1182-  
766 1187 (2010).
- 767 25. Pfab, J., Phan, N.M. & Si, D. DeepTracer for fast de novo cryo-EM protein structure  
768 modeling and special studies on CoV-related complexes. *Proc. Natl. Acad. Sci. USA*  
769 **118**, e2017525118 (2021).
- 770 26. Emsley, P. & Cowtan, K. Coot: model-building tools for molecular graphics. *Acta*  
771 *Crystallogr. D. Biol. Crystallogr.* **60**, 2126-32 (2004).
- 772 27. Adams, P. D., Afonine, P. V., Bunkóczi, G., Chen, V. B., Davis, I. W., Echols, N., ... &  
773 Zwart, P. H. PHENIX: a comprehensive Python-based system for macromolecular  
774 structure solution. *Acta. Crystallogr. D. Biol. Crystallogr.* **66**, 213-221 (2010).
- 775 28. Chang, L., Zhang, Z., Yang, J., McLaughlin, S.H. & Barford, D. Atomic structure of the  
776 APC/C and its mechanism of protein ubiquitination. *Nature* **522**, 450-454 (2015).
- 777 29. Brown, N.G., VanderLinden, R., Watson, E.R., Weissmann, F., Ordureau, A., Wu, K.P.,  
778 Zhang, W., Yu, S., Mercedi, P.Y., Harrison, J.S. and Davidson, I.F. ... & Schulman, B.A.  
779 Dual RING E3 Architectures Regulate Multiubiquitination and Ubiquitin Chain Elongation  
780 by APC/C. *Cell* **165**, 1440-1453 (2016).
- 781 30. Rusnac, D.V. & Zheng, N. Structural Biology of CRL Ubiquitin Ligases. *Adv. Exp. Med.*  
782 *Biol.* **1217**, 9-31 (2020).
- 783 31. Waterhouse, A. Bertoni, M., Bienert, S., Studer, G., Tauriello, G., Gumienny, R., ... &  
784 Schwede, T. SWISS-MODEL: homology modelling of protein structures and complexes.  
785 *Nucleic. Acids. Res.* **46**, W296-W303 (2018).
- 786 32. Holm, L. DALI and the persistence of protein shape. *Protein Sci.* **29**, 128-140 (2020).
- 787 33. Du, F.Y., Navarro-Garcia, F., Xia, Z.X., Tasaki, T. & Varshavsky, A. Pairs of dipeptides  
788 synergistically activate the binding of substrate by ubiquitin ligase through dissociation of  
789 its autoinhibitory domain. *Proc. Natl. Acad. Sci. USA* **99**, 14110-14115 (2002).
- 790 34. Das, R., Mariano, J., Tsai, Y. C., Kalathur, R. C., Kostova, Z., Li, J., ... & Weissman, A.  
791 M. Allosteric activation of E2-RING finger-mediated ubiquitylation by a structurally  
792 defined specific E2-binding region of gp78. *Mol. Cell* **34**, 674-685 (2009).
- 793 35. Metzger, M. B., Liang, Y. H., Das, R., Mariano, J., Li, S., Li, J., ... & Weissman, A. M. A  
794 Structurally Unique E2-Binding Domain Activates Ubiquitination by the ERAD E2,  
795 Ubc7p, through Multiple Mechanisms. *Mol. Cell* **50**, 516-527 (2013).
- 796 36. Zheng, Q., Wang, T., Chu, G. C., Zuo, C., Zhao, R., Sui, X., ... & Liu, L. An E1-Catalyzed  
797 Chemoenzymatic Strategy to Isopeptide-N-Ethylated Deubiquitylase-Resistant Ubiquitin  
798 Probes. *Angew. Chem. Int. Ed. Engl.* **59**, 13496-13501 (2020).
- 799 37. Plechanovova, A., Jaffray, E.G., Tatham, M.H., Naismith, J.H. & Hay, R.T. Structure of a  
800 RING E3 ligase and ubiquitin-loaded E2 primed for catalysis. *Nature* **489**, 115-120  
801 (2012).
- 802 38. Zheng, N. & Shabek, N. Ubiquitin Ligases: Structure, Function, and Regulation. *Annu.*  
803 *Rev. Biochem.* **86**, 129-157 (2017).

- 804 39. Streich, F.C., Jr. & Lima, C.D. Capturing a substrate in an activated RING E3/E2-SUMO  
805 complex. *Nature* **536**, 304-308 (2016).
- 806 40. Xia, Z., Webster, A., Du, F., Piatkov, K., Ghislain, M., & Varshavsky, A. Substrate-  
807 binding sites of UBR1, the ubiquitin ligase of the N-end rule pathway. *J. Biol. Chem.* **283**,  
808 24011-24028 (2008).
- 809 41. Pan, M., Zheng, Q., Ding, S., Zhang, L., Qu, Q., Wang, T., ... & Liu, L. Chemical Protein  
810 Synthesis Enabled Mechanistic Studies on the Molecular Recognition of K27-linked  
811 Ubiquitin Chains. *Angew. Chem. Int. Ed. Engl.* **58**, 2627-2631 (2019).
- 812 42. Qu, Q., Pan, M., Gao, S., Zheng, Q. Y., Yu, Y. Y., Su, J. C., ... & Hu, H. G. A Highly  
813 Efficient Synthesis of Polyubiquitin Chains. *Adv Sci (Weinh)* **5**, 1800234 (2018).
- 814 43. Zheng, S. Q., Palovcak, E., Armache, J. P., Verba, K. A., Cheng, Y., & Agard, D. A.  
815 MotionCor2: anisotropic correction of beam-induced motion for improved cryo-electron  
816 microscopy. *Nat. Methods* **14**, 331-332 (2017).
- 817 44. Mindell, J.A. & Grigorieff, N. Accurate determination of local defocus and specimen tilt in  
818 electron microscopy. *J. Struct. Biol.* **142**, 334-47 (2003).

819

820

821

822
